# Supplementary material for: A porphyrin-triazatruxene dyad for ratiometric two-photon fluorescent sensing of intracellular viscosity
Source: Royal Society of Chemistry journal article supplement (doi:10.1039/d2tb00384h), 2022-01-01
Supplement: d2tb00384h1.pdf [file d2tb00384h1.pdf]

## Electronic Supplementary Information

### **A porphyrin-triazatruxene dyad for ratiometric two-photon fluorescent sensing of intracellular viscosity**

Yi Wang, Tong Lei, Jinghui Zhang, Lei Gong, Yanjie Yang, Xiaolin Ma, Yongqiang Wen, Hongwu Du, Dongdong Qi, Yongzhong Bian, Zhiqiang Liu and Jianzhuang Jiang

#### **Content**

|                                                       |    |
|-------------------------------------------------------|----|
| 1. Chemicals and Instruments .....                    | 2  |
| 2. Synthesis and Characterization .....               | 3  |
| 3. Experimental Methods .....                         | 6  |
| 4. NMR and MALDI-TOF MS Spectra .....                 | 10 |
| 5. Absorption and Fluorescent Emission Data .....     | 19 |
| 6. DFT calculation.....                               | 24 |
| 7. Viscosity response.....                            | 27 |
| 8. MTT Assay and Fluorescence Microscopy Images ..... | 30 |
| 9. References .....                                   | 41 |

## 1. Chemicals and Instruments

All reagents were used directly as obtained commercially unless otherwise noted. Column chromatography was carried out on silica gel (200-300 mesh, Qingdao Ocean Chemicals) and Bio-beads (200-400 mesh, BIORAD S-X1) with the indicated eluents.  $\text{CH}_2\text{Cl}_2$  and  $\text{Et}_3\text{N}$  were freshly distilled from  $\text{CaH}_2$  under  $\text{N}_2$ . THF was freshly distilled from Na under  $\text{N}_2$ .

$^1\text{H}$  NMR spectra were recorded on a Bruker DPX 400 MHz spectrometer in deuterated chloroform ( $\text{CDCl}_3$ ), deuterated tetrahydrofuran ( $\text{THF-}d_8$ ) or deuterated dimethyl sulfoxide ( $\text{DMSO-}d_6$ ) and the chemical shifts ( $\delta$ , ppm) were reported relative to tetramethylsilane ( $\text{SiMe}_4$ ). MALDI-TOF mass spectra were measured on a Bruker Microflex™ LRF spectrometer with dithranol as the matrix. Elemental analyses were performed on an Elementar Vario MICRO CUBE elemental analyzer. Electronic absorption spectra were recorded on a Lambda U-750 spectrophotometer. Steady-state fluorescence spectra were acquired on a FLS980 spectrofluorimeter (Edinburgh). All fluorescence spectra were measured in a quartz cell with 10 mm optical length. A 375 nm laser (EPL) was used as exciting source to measure the fluorescence lifetimes. The two-photon fluorescence emission spectra were measured on a SpectroPro300i spectrometer using the pump laser beam came from a mode-locked Ti:sapphire laser system (Coherent) at the pulse duration of 220 fs, a repetition rate of 76 MHz. The wavelength of the output laser beam was tuned from 730 to 890 nm.

## 2. Synthesis and Characterization

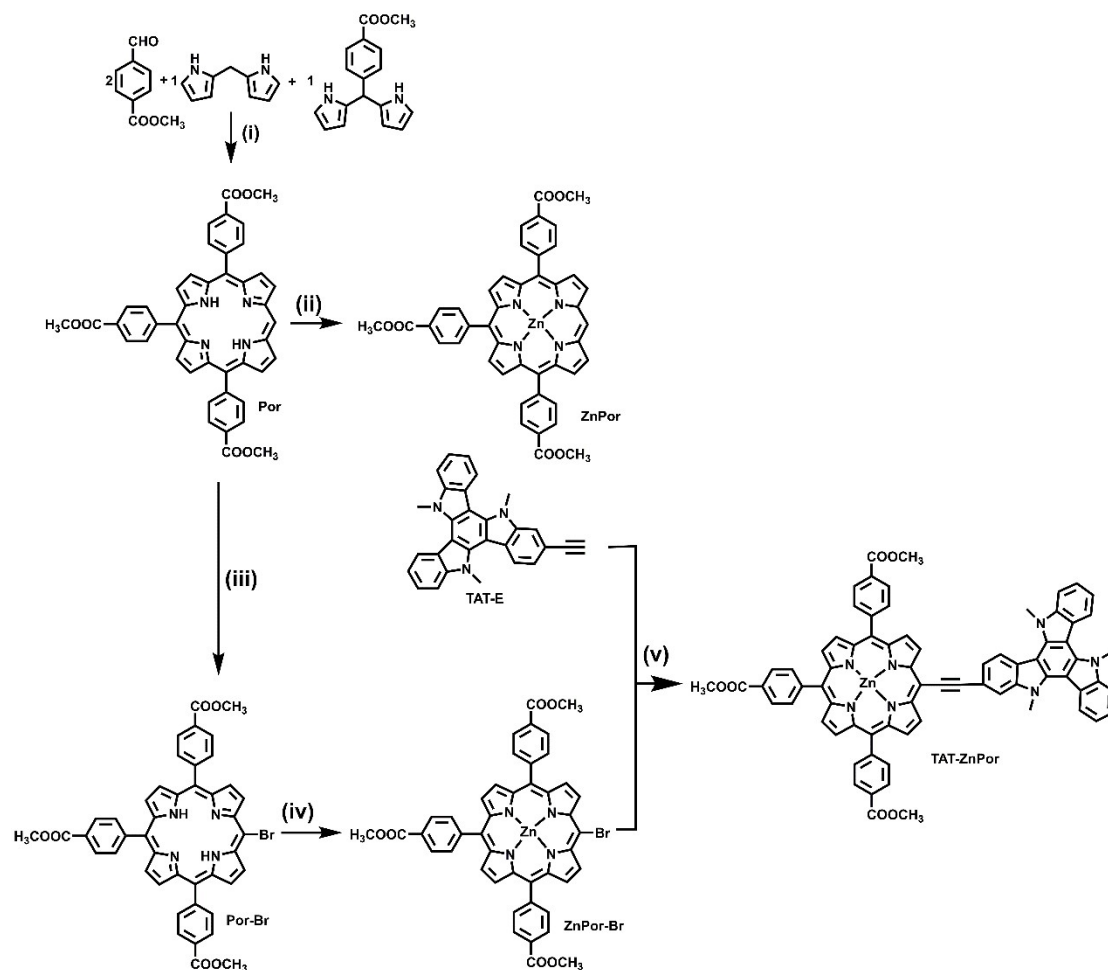

**Scheme S1** Synthesis of porphyrin derivatives: (i) TFA, DDQ, CH<sub>2</sub>Cl<sub>2</sub>, 25 °C; (ii) Zn(OAc)<sub>2</sub>, CHCl<sub>3</sub>/CH<sub>3</sub>OH, reflux; (iii) NBS, CH<sub>2</sub>Cl<sub>2</sub>, 0 °C; (iv) Zn(OAc)<sub>2</sub>, CHCl<sub>3</sub>/CH<sub>3</sub>OH, reflux; (v) Pd(pph<sub>3</sub>)<sub>2</sub>Cl<sub>2</sub>, CuI, THF/Et<sub>3</sub>N, 50 °C.

*Synthesis of Por.* To a freshly distilled CH<sub>2</sub>Cl<sub>2</sub> (700 mL) containing methyl 4-formylbenzoate (1.53 g, 9.30 mmol), dipyrromethane (682 mg, 4.67 mmol), and 4-dipyrrole methyl benzoate (1.31 g, 4.67 mmol) was added TFA (420  $\mu$ L, 5.60 mmol). The mixture was stirred for 4 h at 25 °C under N<sub>2</sub> atmosphere. DDQ (3.13 g, 14 mmol) was added, and the mixture was stirred for 3 h. The crude product was purified by silica gel column with CH<sub>2</sub>Cl<sub>2</sub> as the eluent, where the second fraction was collected and further recrystallized with CH<sub>2</sub>Cl<sub>2</sub>/CH<sub>3</sub>OH to afford compound **Por** (256 mg, 7.7%) as purple solid. <sup>1</sup>H NMR (DMSO, 400 MHz, 293K):  $\delta$  10.62 (s, 1H), 9.65 (d, J = 4.64

Hz, 2H), 8.99 (d,  $J = 4.64\text{Hz}$ , 2H), 8.98 (m, 2H), 8.84 (m, 2H), 8.38(m, 12H), 4.06 (s, 9H), -3.19 (s, 2H). MALDI-TOF-MS:  $m/z$  calcd for  $\text{C}_{44}\text{H}_{32}\text{N}_4\text{O}_6$   $[\text{M}]^+$  712.23; found 712.59. Anal. calcd for  $\text{C}_{44}\text{H}_{32}\text{N}_4\text{O}_6 \cdot \text{H}_2\text{O}$ : C, 72.32%; H, 4.69%; N, 7.67%. Found: C, 72.36%; H, 4.93%; N, 7.41%.

*Synthesis of ZnPor.* To a solution of zinc acetate (50 mg, 0.27 mmol) in  $\text{CHCl}_3/\text{CH}_3\text{OH}$  (v:v, 2:1) 24 mL, porphyrin **Por** (17.5 mg, 0.025 mmol) was added. After refluxing for 2 h, the solvent was removed under reduced pressure and the residue was purified on a silica gel column using  $\text{CH}_2\text{Cl}_2$  as the eluent, and further recrystallized with  $\text{CH}_2\text{Cl}_2$ / n-hexane to afforded compound **ZnPor** (18 mg, 93%) as purple solid.  $^1\text{H}$  NMR ( $\text{CDCl}_3$ , 400 MHz, 293K):  $\delta$  10.33 (s, 1H), 9.44 (d,  $J = 4.34\text{ Hz}$ , 2H), 9.07 (d,  $J = 4.34\text{ Hz}$ , 2H), 8.95 (m, 4H), 8.46 (s, 6H), 8.33 (m, 6H), 4.12 (m, 9H). MALDI-TOF-MS:  $m/z$  calcd for  $\text{C}_{44}\text{H}_{30}\text{N}_4\text{O}_6\text{Zn}[\text{M}]^+$  774.16; found 774.18. Anal. calcd for  $\text{C}_{44}\text{H}_{30}\text{N}_4\text{O}_6\text{Zn} \cdot 2.5\text{H}_2\text{O}$ : C, 64.36%; H, 4.30%; N, 6.82%. Found: C, 64.37%; H, 4.25%; N, 6.73%.

*Synthesis of Por-Br.* To a solution of **Por** (240 mg, 0.34 mmol) in  $\text{CH}_2\text{Cl}_2$  (50 mL), NBS (60 mg, 0.34 mmol) was added dropwise in 30 min at 0 °C. After the mixture was stirred for another 1 h, the solvent was removed in vacuum. The residual was then purified on a silica gel columns using  $\text{CH}_2\text{Cl}_2$ / n-hexane (v:v, 3:1) as the eluent and further recrystallized with  $\text{CH}_2\text{Cl}_2$ /  $\text{CH}_3\text{OH}$  to afforded **Por-Br** (205 mg, 77%) as purple solid.  $^1\text{H}$  NMR ( $\text{CDCl}_3$ , 400 MHz, 293K):  $\delta$  9.71 (d,  $J = 4.4\text{ Hz}$ , 2H), 8.78 (d,  $J = 4.4\text{ Hz}$ , 2H), 8.76 (m, 4H), 8.45 (s, 6H), 8.26 (m, 6H), 4.13 (m, 9H), -2.71 (s, 2H). MALDI-TOF-MS:  $m/z$  calcd for  $\text{C}_{44}\text{H}_{31}\text{BrN}_4\text{O}_6[\text{M}]^+$  790.14; found 792.09. Anal. calcd for  $\text{C}_{44}\text{H}_{31}\text{BrN}_4\text{O}_6 \cdot \text{H}_2\text{O}$ : C, 65.27%; H, 4.11%; N, 6.92%. Found: C, 66.47%; H, 4.51%; N, 6.75%.

*Synthesis of ZnPor-Br.* To a solution of zinc acetate (500 mg, 2.70 mmol) in  $\text{CHCl}_3$ /methanol (v:v, 2:1) 150 mL, porphyrin **Por-Br** (193 mg, 0.24 mmol) was added. After refluxing for 2 h, the solvent was removed under reduced pressure and the residue

was purified on a silica gel column using CH<sub>2</sub>Cl<sub>2</sub>/n-hexane (v:v, 4:1) as the eluent, and further recrystallized with CH<sub>2</sub>Cl<sub>2</sub>/ CH<sub>3</sub>OH to afforded compound **ZnPor-Br** (176 mg, 83%) as purple solid. <sup>1</sup>H NMR (CDCl<sub>3</sub>, 400 MHz, 293K): δ 9.79 (d, J = 4.75 Hz, 2H), 8.94 (d, J = 4.75 Hz, 2H), 8.85 (m, 4H), 8.42 (s, 6H), 8.27 (d, J = 4.0 Hz, 6H), 4.10(m, 9H). MALDI-TOF-MS: m/z calcd for C<sub>44</sub>H<sub>29</sub>BrN<sub>4</sub>O<sub>6</sub>Zn[M]<sup>+</sup> 854.07; found 854.04. Anal. calcd for C<sub>44</sub>H<sub>29</sub>BrN<sub>4</sub>O<sub>6</sub>Zn·1.5H<sub>2</sub>O: C, 59.91%; H, 3.66%; N, 6.35%. Found: C, 59.92%; H, 3.65%; N, 5.86%.

### 3. Experimental Methods

**Quantum yield measurement.** Fluorescence quantum yields of **TAT-E**, **ZnPor** and **TAT-ZnPor** were determined. The quantum yield was calculated using the following equation:

$$\Phi_x = \Phi_s(A_s F_x n_x^2) / (A_x F_s n_s^2)$$

Where  $\Phi$  is the fluorescence quantum yield,  $A$  is the absorbance at the excitation wavelength,  $F$  is the area under the corrected emission curve, and  $n$  is the refractive index of the solvents used. Subscripts  $s$  and  $x$  refer to the standard and to the sample respectively. Herein, the absorption at the excitation wavelength was kept below 0.05.

**Two-photon absorption cross section measurement.** The two-photon excited fluorescence (TPEF) method was used to measure the TPA cross-sections ( $\delta_{\text{TPA}}$ ). Samples were dissolved in THF at the concentration of  $2 \times 10^{-6}$  M and the two-photon induced fluorescence intensity was measured at 730-890 nm by using Rhodamine B ( $2 \times 10^{-6}$  M in methanol) as the reference.<sup>1,2</sup> The intensities of the two-photon-induced fluorescence spectra of the reference and samples under the same measurement conditions were determined and compared. The TPA cross-section of samples, measured by using the two-photon-induced fluorescence measurement technique, can be calculated by using the following equation:

$$\delta_s = \delta_r(F_s \Phi_r C_r n_r) / (F_r \Phi_s C_s n_s)$$

where the subscripts  $s$  and  $r$  stand for the sample and reference molecules, respectively.  $F$  is the integral area of the two-photon fluorescence;  $\Phi$  is the fluorescence quantum yield; and  $C$  is the number density of the molecules in solution.  $\delta_r$  is the TPA cross-section of the reference molecule;  $n$  is the refractive indices of the solvent. The measurements were conducted in a regime where the fluorescence signal showed a quadratic dependence on the excitation intensity, as expected for two-photon-induced emission.

**DFT calculation.** The density functional theory (DFT) and time-dependent density

functional theory (TD-DFT)<sup>3</sup> calculations were performed on the level of PBE0<sup>4</sup>/BS using Gaussian 09 D.01 software package.<sup>5</sup> The BS donates a mixed basis set including 6-311G(d) for C/H/N atoms and SDD for Zn atom.<sup>6</sup> Besides, the built-in PCM model was used to simulate the tetrahydrofuran (THF) solution environment.<sup>7</sup> Firstly, the  $\pi$ -LOL calculation were carried out using Multiwfn program,<sup>8</sup> which is a function for locating high-localization regions of  $\pi$  orbitals. When the isovalue of the surface is 0.2, both strong and weak  $\pi$  bonds are displayed. The results of TD-DFT calculation were further processed by TD-Analy 1.13.<sup>9</sup>

**Cell Culture.** A549 cells were incubated in DMEM containing 10% fetal bovine serum and 100 U/mL penicillin and 100 U/mL streptomycin at 37 °C in a humidified environment containing 5% CO<sub>2</sub>. Before the experiment, the cells were precultured until confluence was reached. Stock solutions of the test compounds (1 mM) were prepared in DMSO and stored in the dark at -20 °C. These compounds were diluted to a working solution (2  $\mu$ M) with DMEM when used in the fluorescence imaging.

**MTT assay.** A549 cells were seeded into a 96-well plate at 37 °C in a humidified incubator containing 5% CO<sub>2</sub> for 24 h. Then the cells were incubated with different concentrations of **TAT-ZnPor** (0, 2, 4, 8 and 16  $\mu$ M) in culture medium for 30 min, respectively. The cells were washed with PBS for twice and cultured with fresh DMEM for another 24 h. Then 20  $\mu$ L MTT solution (5 mg/mL) was added to each well. About 4 h later, the remaining MTT solution was carefully removed, and 150  $\mu$ L DMSO was added to each well to dissolve the formed formazan crystals. After gentle agitation for 10 min, the absorbance at 492 nm was measured using the Tecan Sunrise<sup>TM</sup> microplate reader. The cell viability rate ( $V_R$ ) was calculated according to the equation:

$$V_R = A/A_0 \times 100\%$$

where A is the absorbance of the experimental group (the cells were treated by **TAT-ZnPor** with different concentration, respectively) and  $A_0$  is the absorbance of the control group (the cells were treated by DMEM without dyes).

**One-Photon and Two-Photon Cellular Imaging.** A549 cells were grown on glass-

bottom culture dishes in Dulbecco's modified eagle media supplemented with 10% (v/v) fetal bovine serum, penicillin (100 µg/mL), and streptomycin (100 µg/mL) at 37 °C in a 5% CO<sub>2</sub> incubator. Cells were treated with **TAT-ZnPor** (2 µM in DMEM) for 30 min and then washed with PBS solution to remove the excess **TAT-ZnPor**. Fluorescence imaging experiments were performed at 37 °C on a Nikon A1RSi<sup>+</sup> confocal laser scanning microscope with live cell imaging system and excitation at 405 nm, 457 nm (for one-photon excitation) or 820 nm (for two-photon excitation) through 60× oil immersion objective lens.

**Co-localization fluorescence imaging.** A549 cells were incubated with **TAT-ZnPor** (2 µM in DMEM, with 0.2% DMSO) at 37 °C for 30 min, and then stained with DilC18(3) (1 µM), MitoLite Blue FX 490 (20 µM), LysoTracker Blue DND-22 (100 nM), ER-tracker Blue-White DPX (100 nM) or ActinBlue (50 U/mL) for another 20 min. Before fluorescence imaging, the adherent cells were further washed twice with PBS (pH = 7.4) to remove the excess dyes. Fluorescence imaging experiments were performed on a LeicaSP8 confocal laser scanning microscope through 100× objective lens. Four color channels were used for these experiments: red channel ( $\lambda_{\text{ex}} = 405 \text{ nm}$ ,  $\lambda_{\text{em}} = 550\text{-}700 \text{ nm}$ ) and green channel ( $\lambda_{\text{ex}} = 405 \text{ nm}$ ,  $\lambda_{\text{em}} = 500\text{-}550 \text{ nm}$ ) for **TAT-ZnPor**, blue channel ( $\lambda_{\text{ex}} = 405 \text{ nm}$ ,  $\lambda_{\text{em}} = 400\text{-}500 \text{ nm}$ ) for MitoTracker Blue FX 490 LysoTracker Blue DND-22, ER-tracker Blue-White DPX (100 nM), ActinBlue (50 U/mL), and orange channel ( $\lambda_{\text{ex}} = 552 \text{ nm}$ ,  $\lambda_{\text{em}} = 550\text{-}600 \text{ nm}$ ) for DilC18(3).

**Cell viscosity detection.** A549 cells were stained with DMEM containing **TAT-ZnPor** (2 µM) for 30 min at 37 °C in a 5% CO<sub>2</sub> incubator, then the adherent cells were washed with PBS (pH = 7.4) to remove the excess **TAT-ZnPor**. The cells were further incubated 20 min in the presence of 100 nM nystatin or monensin. Fluorescence imaging experiments were performed on a Leica SP8 confocal microscope through 60× objective lens. Upon the excitation of 405 nm, the green channel images (500-550 nm) and the red channel images (550-700 nm) were collected, respectively.



#### 4. NMR and MALDI-TOF MS Spectra

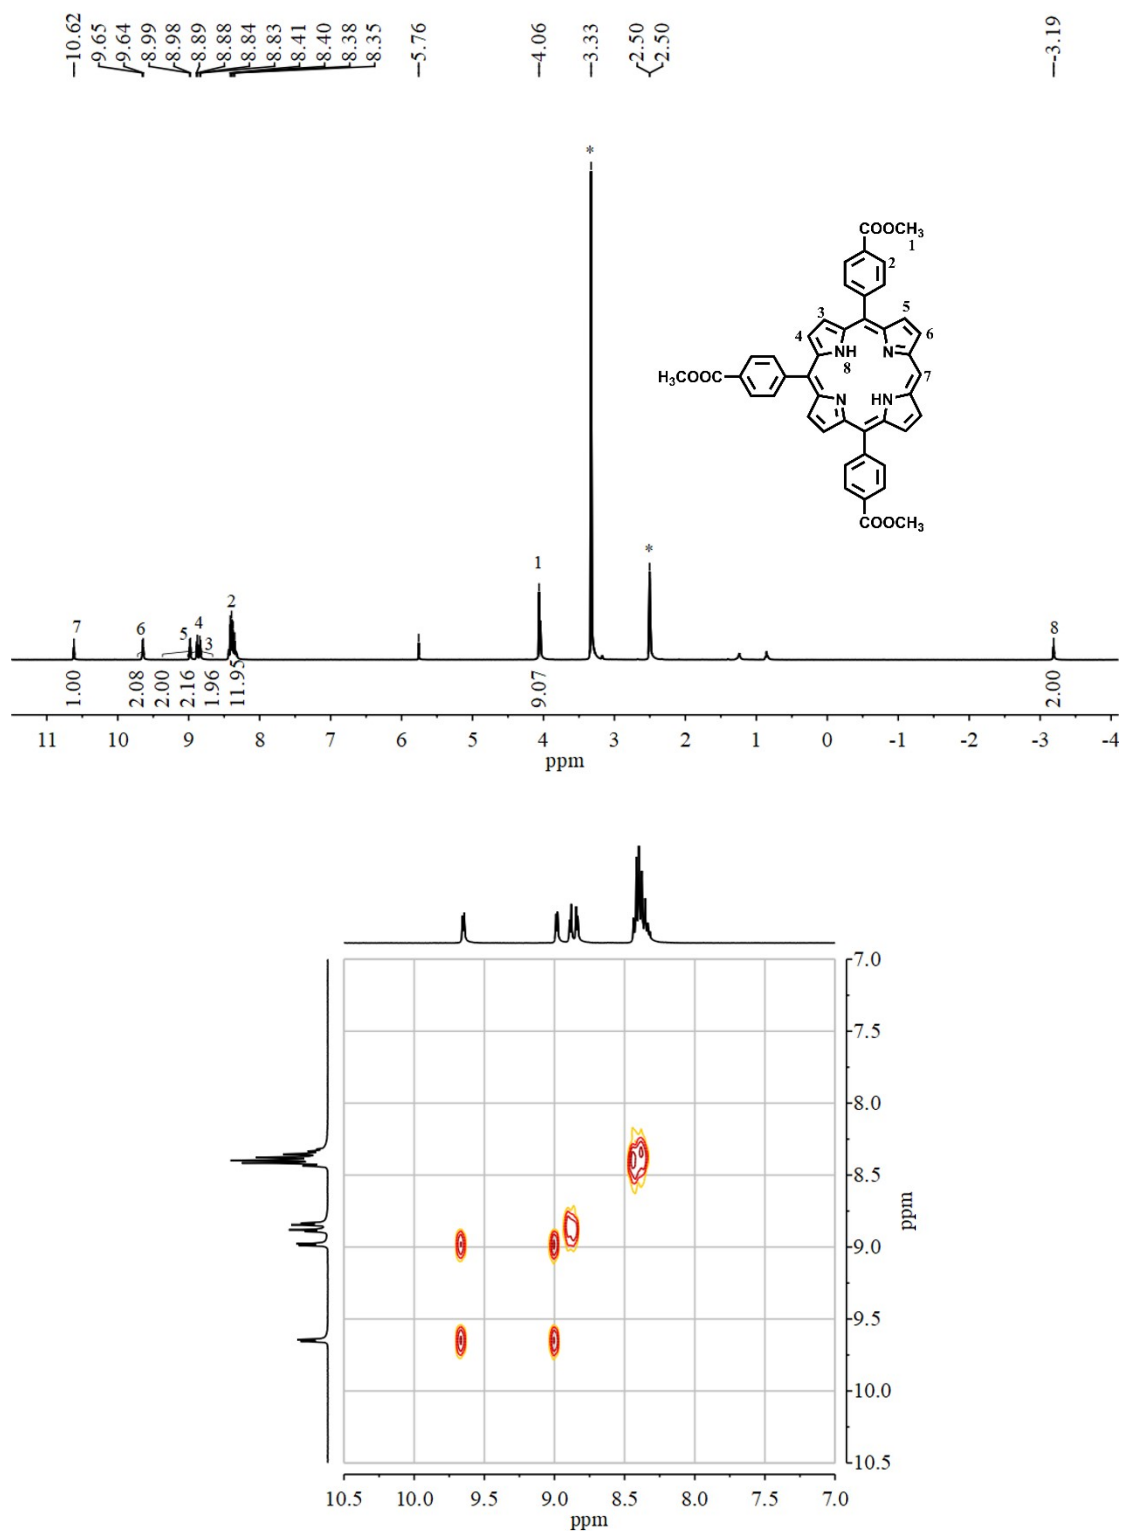

**Fig. S1**  $^1\text{H}$  and  $^1\text{H}$ - $^1\text{H}$  COSY NMR spectra of the compound **Por** in  $\text{DMSO-}d_6$  at 293 K. \* indicate the residual solvent signals.

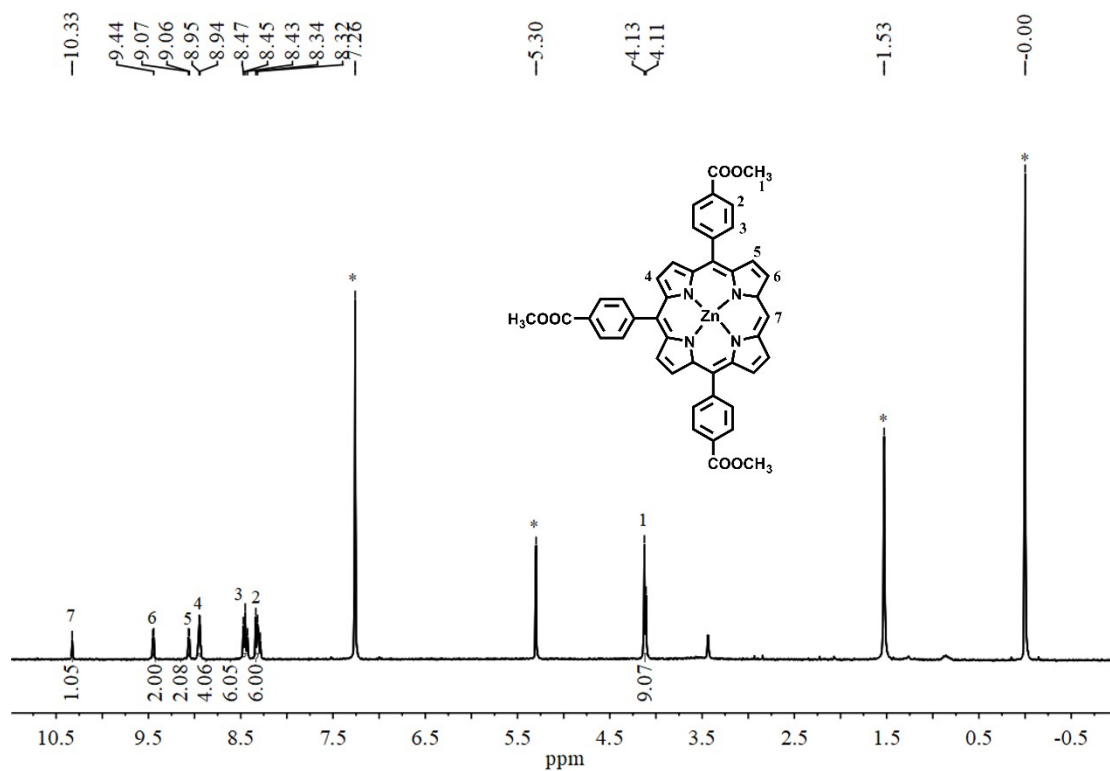

**Fig. S2**  $^1\text{H}$  NMR spectrum of the compound **ZnPor** in  $\text{CDCl}_3$  at 293 K.\* indicate the residual solvent signals.

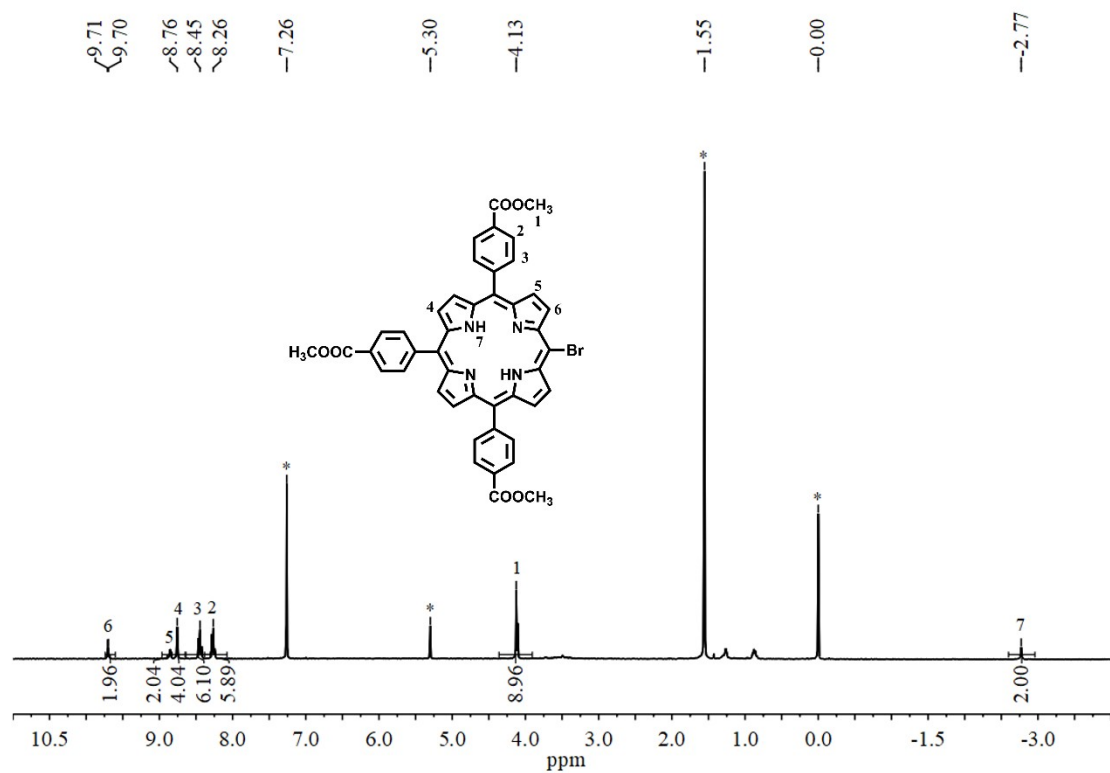

**Fig. S3** <sup>1</sup>H NMR spectrum of the compound **Por-Br** in CDCl<sub>3</sub> at 293 K.\* indicate the residual solvent signals.

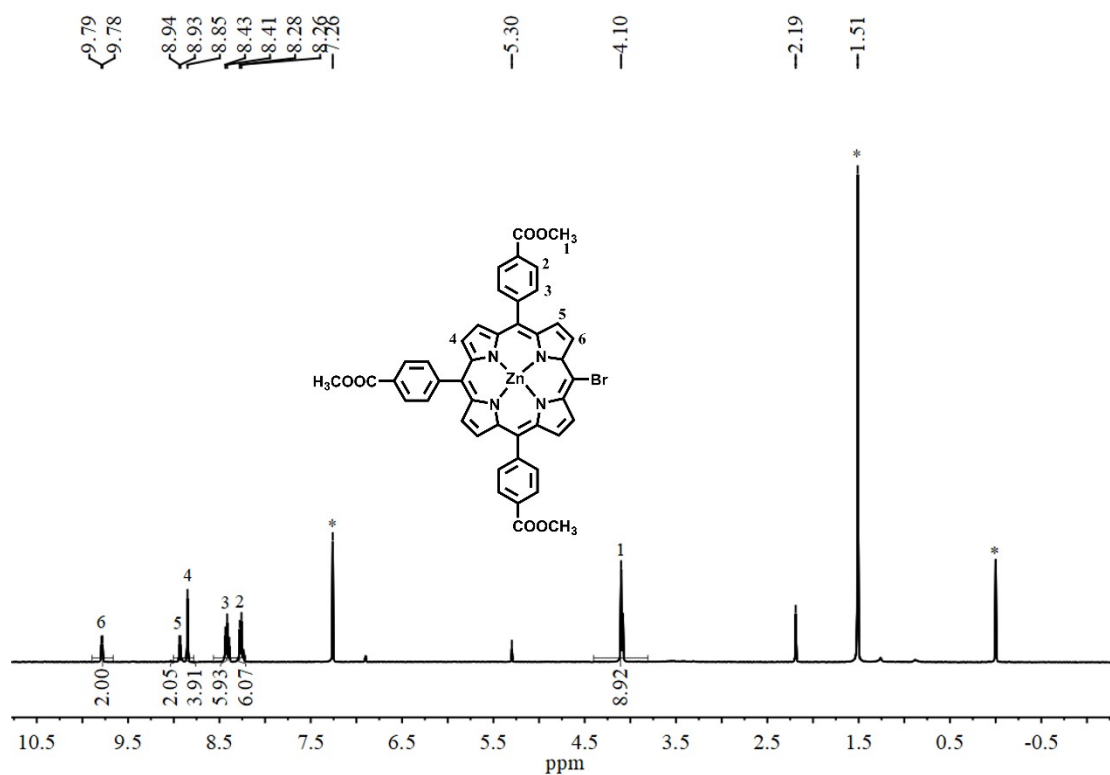

**Fig. S4**  $^1\text{H}$  NMR spectrum of the compound **ZnPor-Br** in  $\text{CDCl}_3$  at 293 K.\* indicate the residual solvent signals.

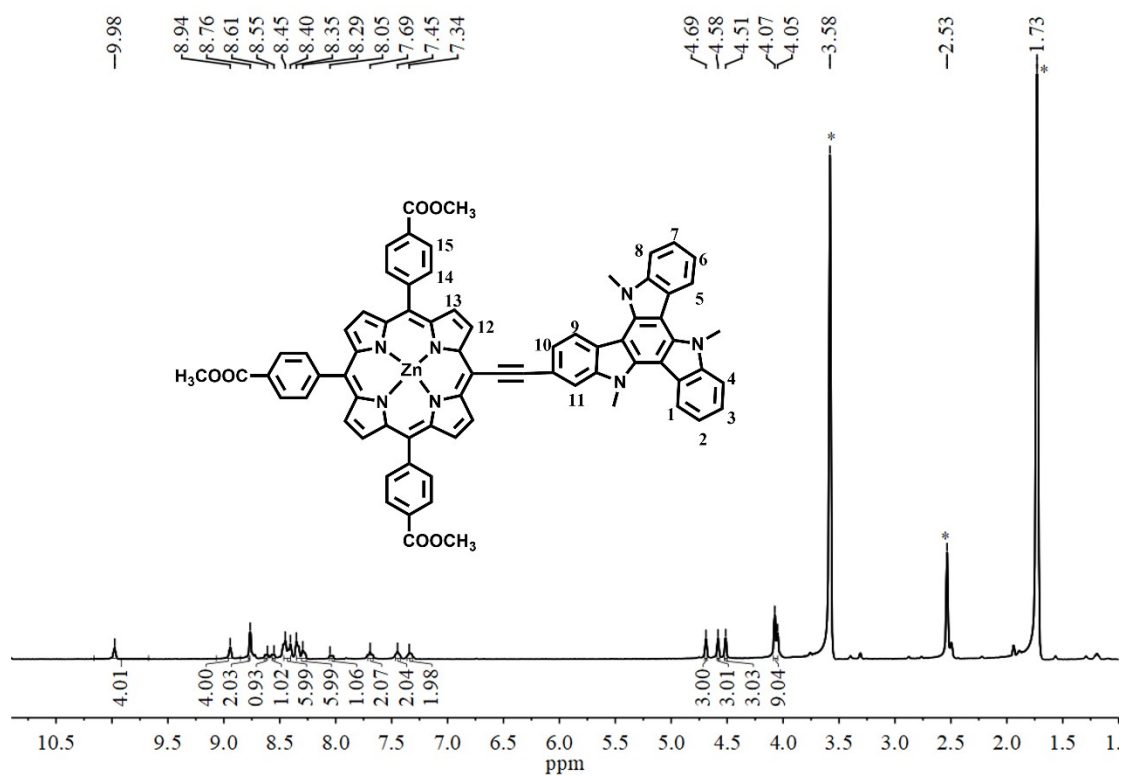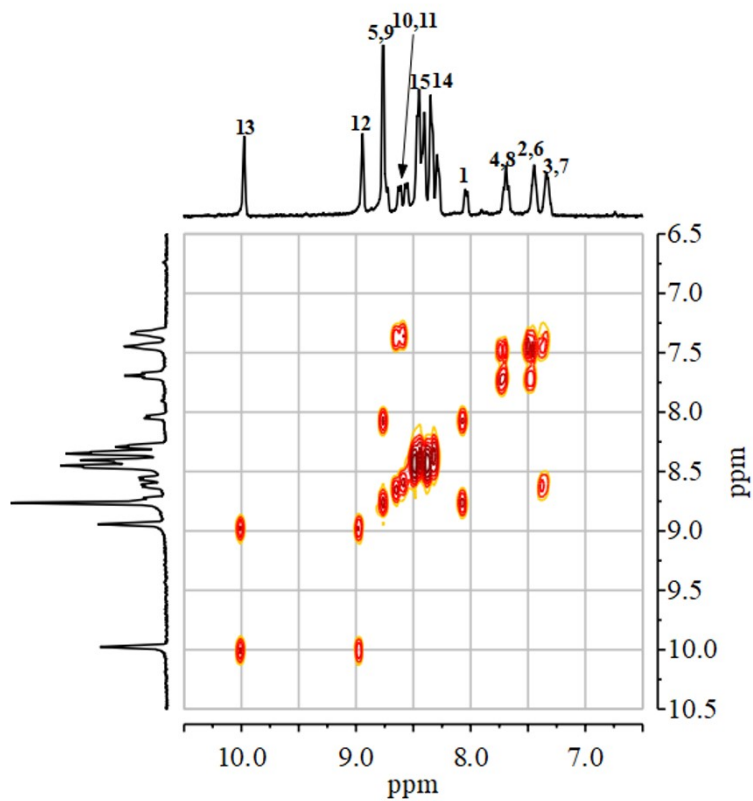

**Fig. S5**  $^1\text{H}$  and  $^1\text{H}$ - $^1\text{H}$  COSY NMR spectra of the compound **TAT-ZnPor** in  $\text{THF-}d_8$  at 293 K. \* indicate the residual solvent signals.

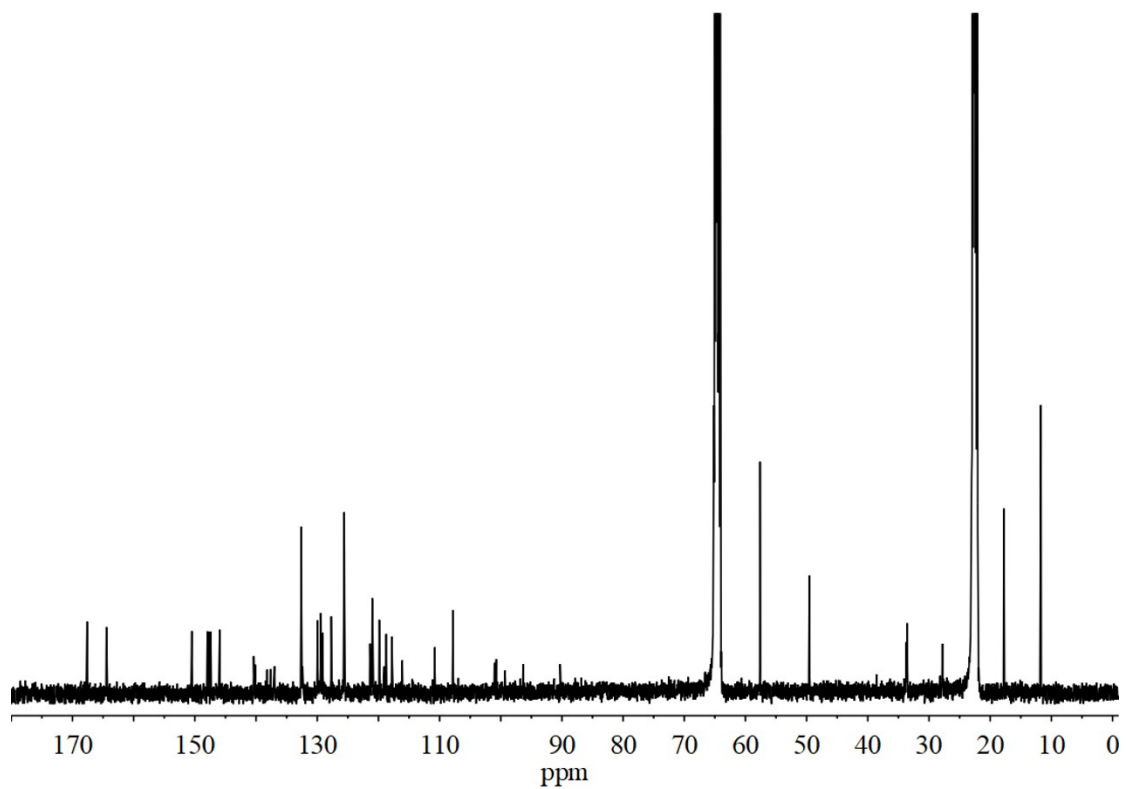

**Fig. S6**  $^{13}\text{C}$  NMR spectrum of the compound **TAT-ZnPor** in  $\text{THF-}d_8$  at 293 K.\*  
indicate the residual solvent signals.

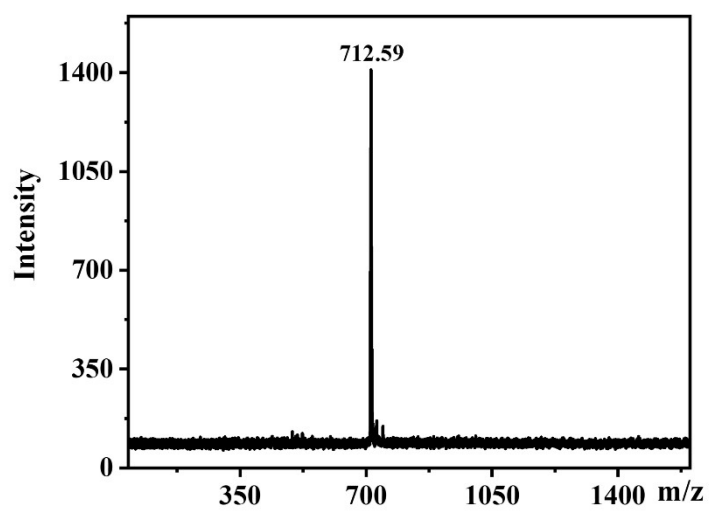

**Fig. S7** MALDI-TOF mass spectrum of **Por**.

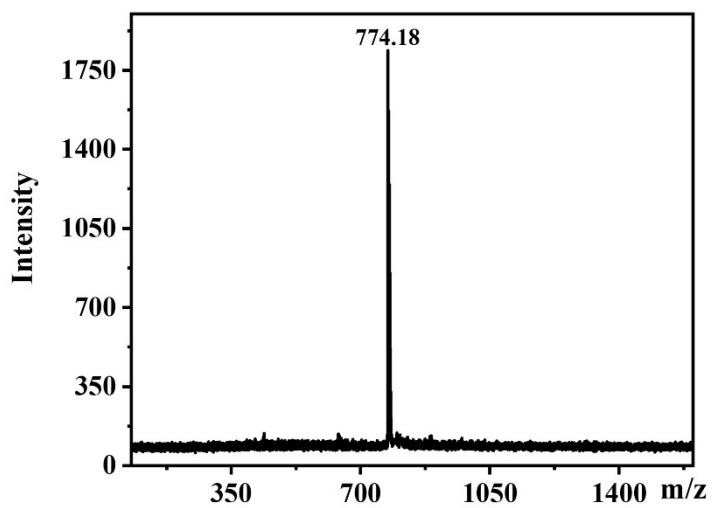

**Fig. S8** MALDI-TOF mass spectrum of **ZnPor**.

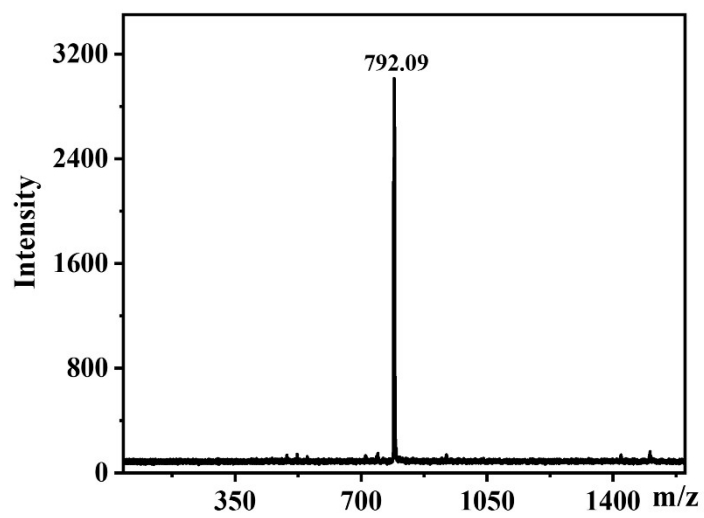

Fig. S9 MALDI-TOF mass spectrum of **Por-Br**.

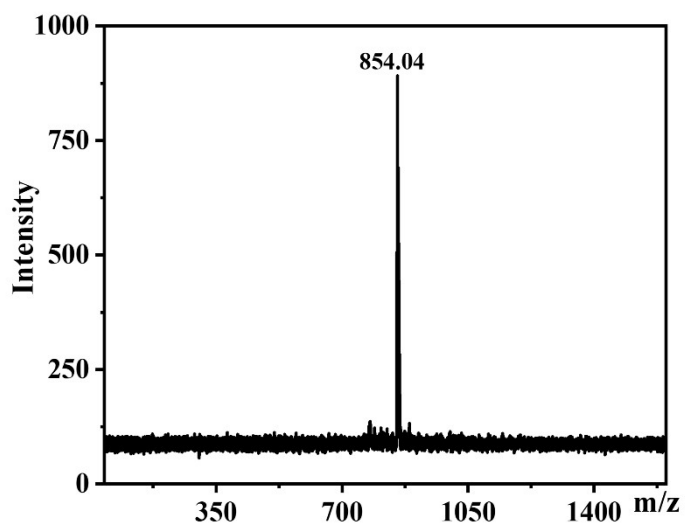

Fig. S10 MALDI-TOF mass spectrum of **ZnPor-Br**.



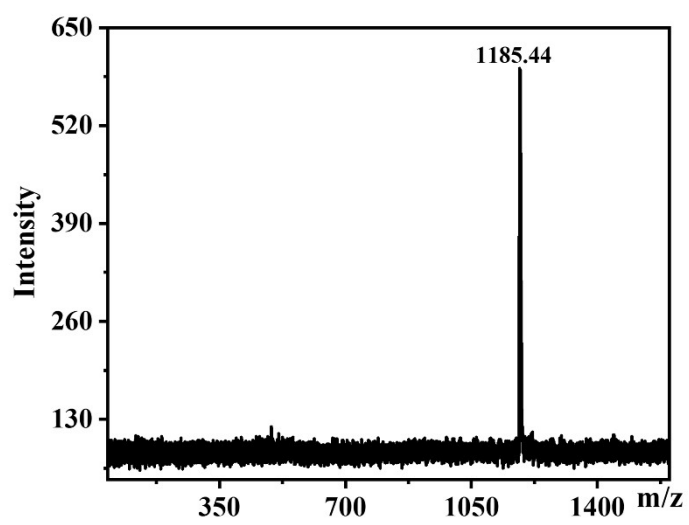

**Fig. S11** MALDI-TOF mass spectrum of TAT-ZnPor.

## 5. Absorption and Fluorescent Emission Data

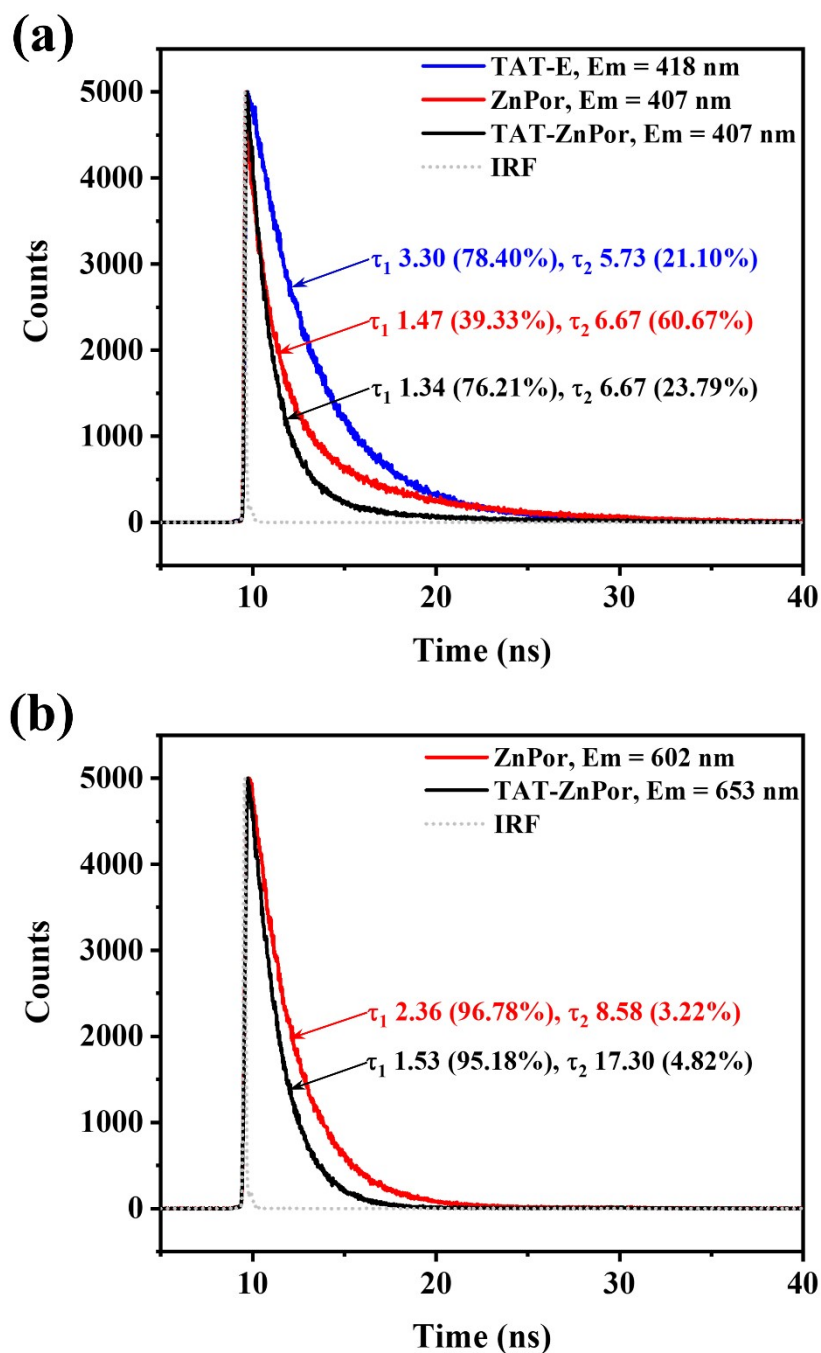

**Fig. S12** Fluorescence decay curves of TAT-E, ZnPor and TAT-ZnPor (2  $\mu$ M) at (a) blue-green emission band and (b) red emission band. The time profiles of fluorescence decays were obtained with excitation at 375 nm by a EPL laser. Dotted line is the instrument response function (IRF) of the system.

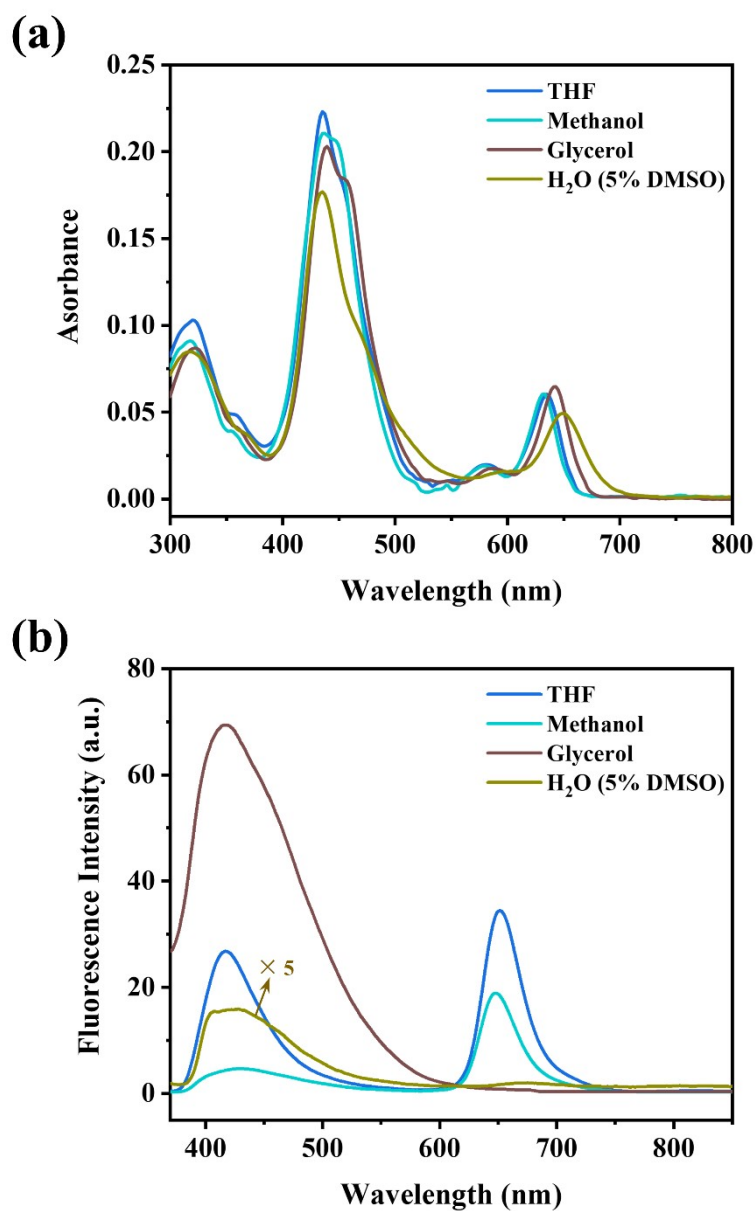

**Fig. S13** (a) Absorption and (b) Fluorescence emission spectra of TAT-ZnPor in different solvents (1  $\mu$ M,  $\lambda_{\text{ex}} = 350$  nm).

**Table S1** Photophysical data of **TAT-E**, **ZnPor** and **TAT-ZnPor** in THF.

|           | Absorption $\lambda_{\max}$ [nm]<br>Log $\epsilon$ ( $M^{-1} \text{ cm}^{-1}$ ) |               |               |               | Emission $\lambda_{\max}$ [nm] <sup>a</sup><br>( $\Phi_{\text{em}}$ ) <sup>b</sup><br>( $\tau_1, \tau_2$ [ns]) <sup>c</sup> |                                | $\delta_{\text{TPA}}$          | $\Phi_{\text{em}}\delta_{\text{TPA}}^g$ |     |
|-----------|---------------------------------------------------------------------------------|---------------|---------------|---------------|-----------------------------------------------------------------------------------------------------------------------------|--------------------------------|--------------------------------|-----------------------------------------|-----|
|           |                                                                                 |               |               |               |                                                                                                                             |                                |                                |                                         |     |
| TAT-E     | 319<br>(5.08)                                                                   |               |               |               | 418<br>(0.19)<br>(3.30, 5.73)                                                                                               |                                | 53 <sup>d</sup>                | 11                                      |     |
| ZnPor     | 314<br>(4.44)                                                                   | 420<br>(5.83) | 550<br>(4.44) | 590<br>(3.79) | 407, 446<br>(0.013)<br>(1.47, 6.67)                                                                                         | 602<br>(0.20)<br>(2.36, 8.58)  | 17 <sup>e</sup>                | 3.4                                     |     |
| TAT-ZnPor | 323<br>(4.98)                                                                   | 436<br>(5.50) | 454<br>(5.34) | 582<br>(4.30) | 637<br>(4.80)                                                                                                               | 407<br>(0.021)<br>(1.34, 6.67) | 653<br>(0.40)<br>(1.53, 17.30) | 811 <sup>f</sup>                        | 324 |

<sup>a</sup>Excitation wavelength:350 nm.

<sup>b</sup>Fluorescence quantum yields were determined by reference to quinine sulfate in 0.1 M H<sub>2</sub>SO<sub>4</sub> ( $\Phi = 0.54$ )<sup>10</sup> upon excitation at 350 nm.

<sup>b</sup>Fluorescence quantum yields were determined by reference to H<sub>2</sub>TPP in toluene ( $\Phi = 0.13$ )<sup>11</sup> upon excitation of 420 nm.

<sup>c</sup>The fluorescence lifetimes were measured with 375 nm EPL laser excitation in THF.

<sup>d</sup>Two-photon cross section (GM:10<sup>-50</sup>cm<sup>4</sup>s/photon) at 740 nm.

<sup>e</sup>Two-photon cross section at 810 nm.

<sup>f</sup>Two-photon cross section at 820 nm.

<sup>g</sup>Two-photon action cross section ( $\Phi_{\text{em}}\delta_{\text{TPA}}$ ).

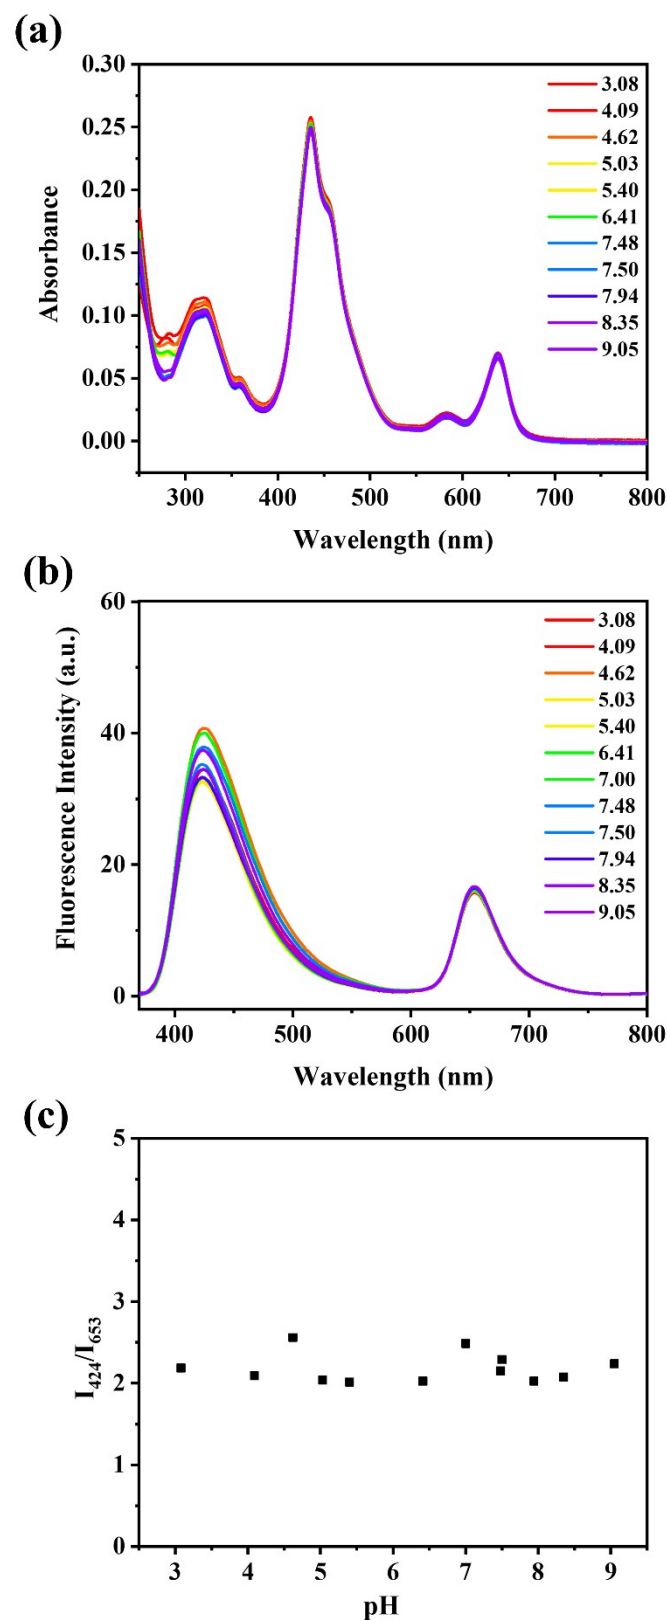

**Fig. S14** (a) Absorption and (b) Fluorescence emission spectra of **TAT-ZnPor** in different pH values (pH = 3-9,  $V_{\text{THF}}: V_{\text{Water}} = 1:1$ ); (c) Plots of intensity ratio ( $I_{424}/I_{653}$ ) vs. pH value (1  $\mu\text{M}$ ,  $\lambda_{\text{ex}} = 350$  nm).

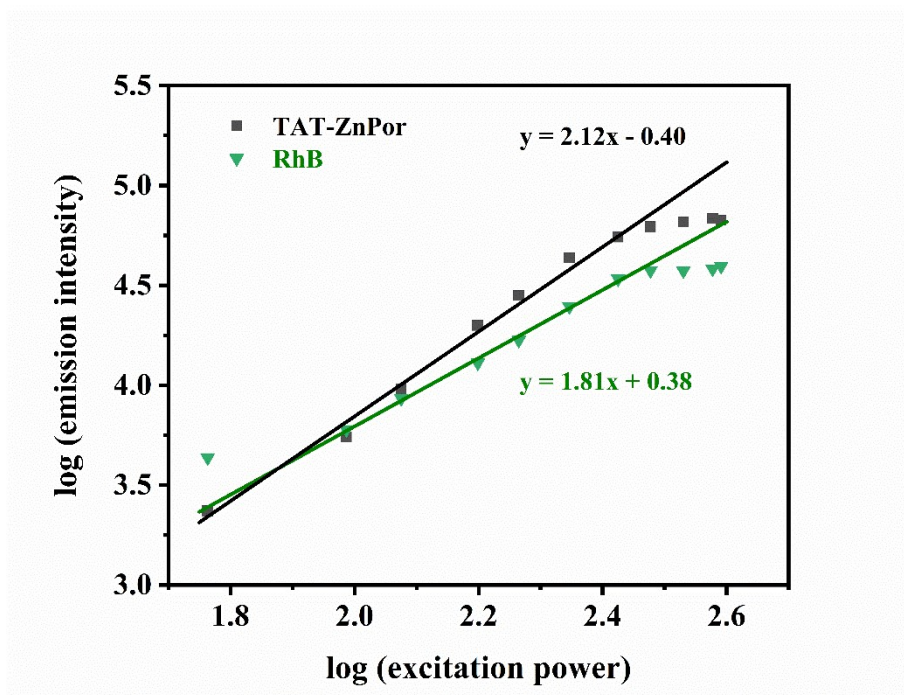

**Fig. S15** Power dependence plots of the fluorescence intensity of **TAT-ZnPor** (in THF) and RhB (in CH<sub>3</sub>OH) upon excitation at 800 nm (220 fs, 76 Hz).

## 6. DFT calculation

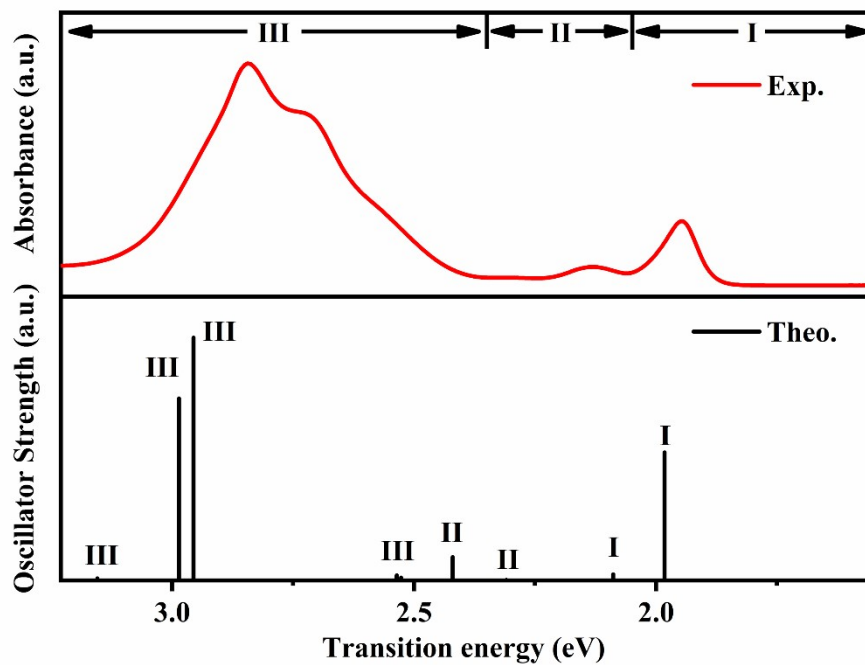

**Fig. S16** The experimental and simulated electronic absorption spectra for TAT-ZnPor.

**Table S2** Light induced electron tranfering direction (LIETD, isovalue:  $2.0 \times 10^{-4} \text{ e} \cdot \text{au}^{-3}$ ) and light harvesting efficiency (LHE) for **TAT-ZnPor**. Electron densities move from the blue area to the red area.

| <b>Region I</b>                                                          |  |                                                                                              |
|--------------------------------------------------------------------------|--|----------------------------------------------------------------------------------------------|
| <b>Transition</b><br><b>Energy:</b><br>1.98 eV<br><b>LHE :</b><br>90.32% |  | <b>Transition:</b><br>H - 3 → L+1(7%)<br>H → L(88%)                                          |
| <b>Transition</b><br><b>Energy:</b><br>2.09 eV<br><b>LHE:</b><br>10.75%  |  | <b>Transition:</b><br>H - 3 → L(22%)<br>H - 2 → L+1(8%)<br>H → L+1(70%)                      |
| <b>Region II</b>                                                         |  |                                                                                              |
| <b>Transition</b><br><b>Energy:</b><br>2.31 eV<br><b>LHE:</b><br>0.73%   |  | <b>Transition:</b><br>H - 1 → L(99%)                                                         |
| <b>Transition</b><br><b>Energy:</b><br>2.42 eV<br><b>LHE:</b><br>34.55%  |  | <b>Transition:</b><br>H - 3 → L+1(27%)<br>H - 2 → L(62%)<br>H → L(9%)                        |
| <b>Region III</b>                                                        |  |                                                                                              |
| <b>Transition</b><br><b>Energy:</b><br>2.53 eV<br><b>LHE:</b><br>5.11%   |  | <b>Transition:</b><br>H - 3 → L(11%)<br>H - 2 → L+1(16%)<br>H - 1 → L+1(61%)<br>H → L+1(11%) |
| <b>Transition</b><br><b>Energy:</b><br>2.54 eV<br><b>LHE :</b><br>8.80%  |  | <b>Transition:</b><br>H - 3 → L(18%)<br>H - 2 → L+1(26%)<br>H - 1 → L+1(38%)<br>H → L+1(16%) |



|                                                                         |                                                                                     |                                                                                   |
|-------------------------------------------------------------------------|-------------------------------------------------------------------------------------|-----------------------------------------------------------------------------------|
| <p><b>Transition Energy:</b><br/>2.96eV<br/><b>LHE:</b><br/>98.81%</p>  | 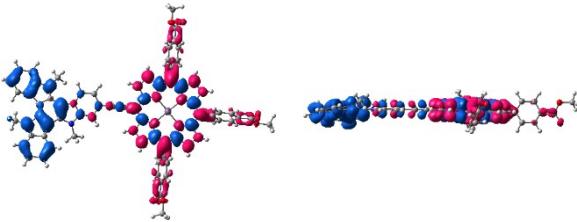  | <p><b>Transition:</b><br/>H - 3 → L+1(54%)<br/>H - 2 → L(31%)<br/>H → L+5(6%)</p> |
| <p><b>Transition Energy:</b><br/>2.99 eV<br/><b>LHE:</b><br/>96.39%</p> |   | <p><b>Transition:</b><br/>H - 3 → L(46%)<br/>H - 2 → L+1(49%)</p>                 |
| <p><b>Transition Energy:</b><br/>3.15 eV<br/><b>LHE:</b><br/>3.59%</p>  |   | <p><b>Transition:</b><br/>H - 4 → L(96%)</p>                                      |
| <p><b>Transition Energy:</b><br/>3.23 eV<br/><b>LHE:</b><br/>1.82%</p>  |  | <p><b>Transition:</b><br/>H - 2 → L+3(6%)<br/>H → L+3(86%)</p>                    |

## 7. Viscosity response

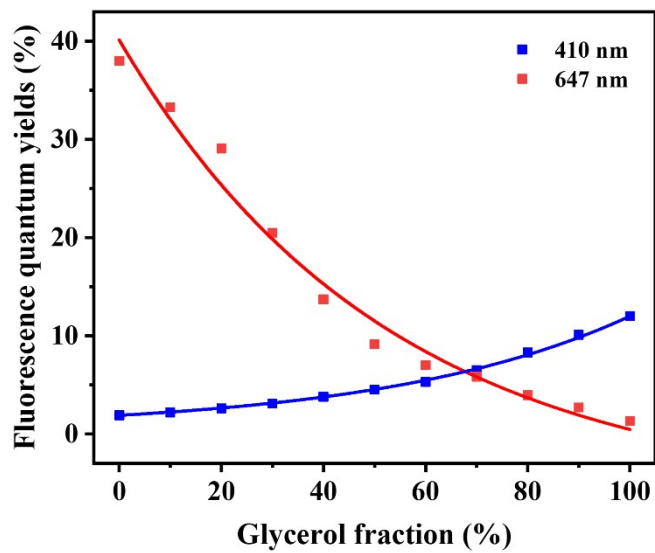

**Fig. S17** Fluorescence quantum efficiencies of TAT-ZnPor at 410 and 647 nm in methanol/glycerol mixtures.

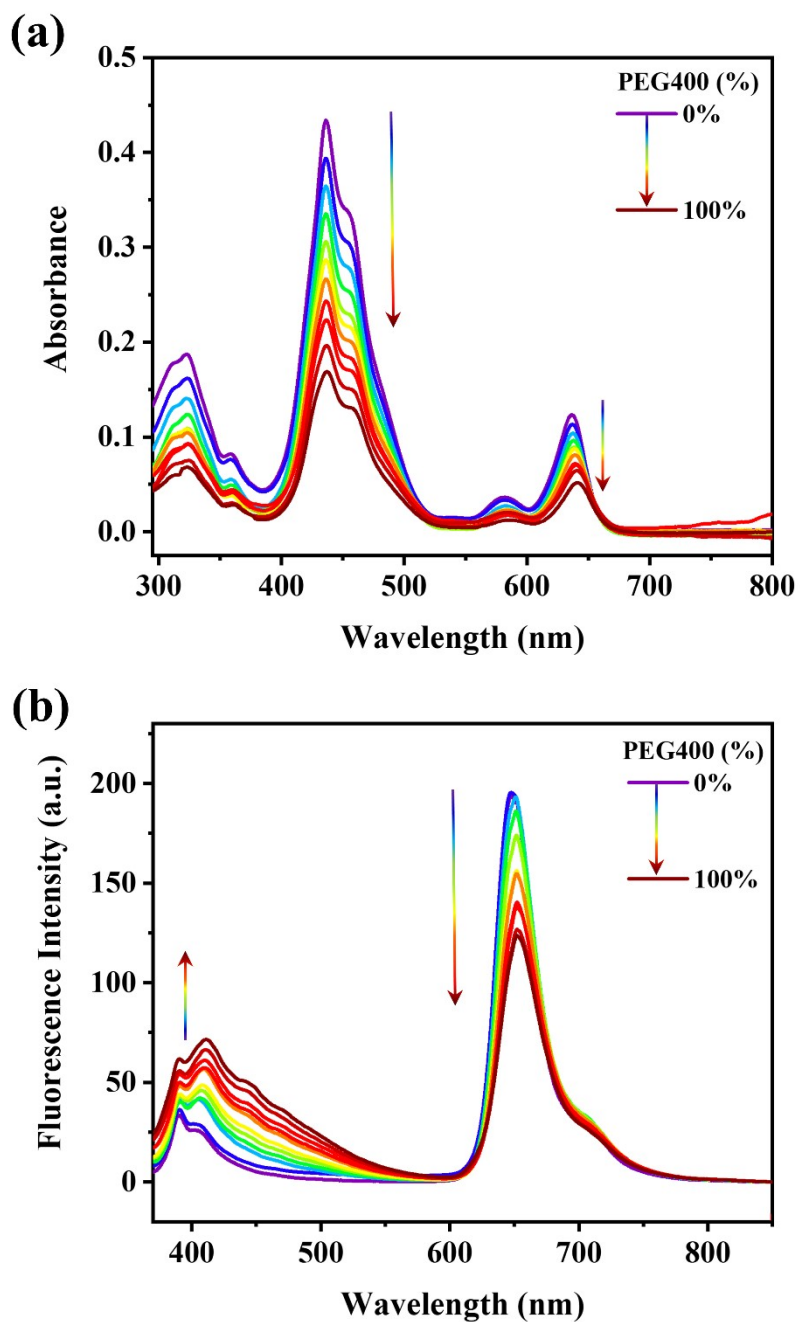

**Fig. S18** (a) Absorption and (b) Fluorescence emission spectra of TAT-ZnPor in THF/PEG400 mixtures (1  $\mu$ M,  $\lambda_{\text{ex}}$  = 350 nm, 0-100% PEG400).

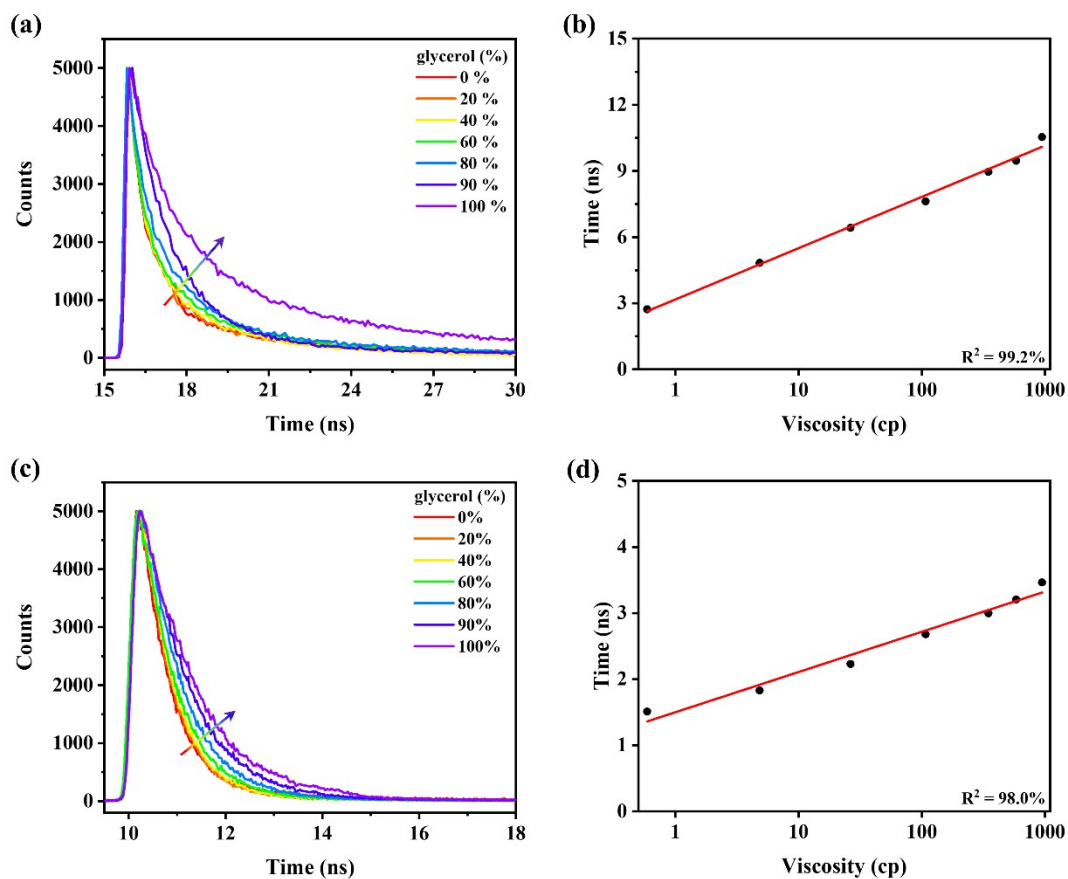

**Fig. S19** Fluorescence decay curves of TAT-ZnPor (1  $\mu\text{M}$ ) at (a) 410 and (c) 647 nm in methanol/glycerol mixtures determined with excitation at 375 nm by a EPL laser; Linear relationship between fluorescence lifetime and solvent viscosity at (b) 410 and (d) 647 nm.

## 8. MTT Assay and Fluorescence Microscopy Images

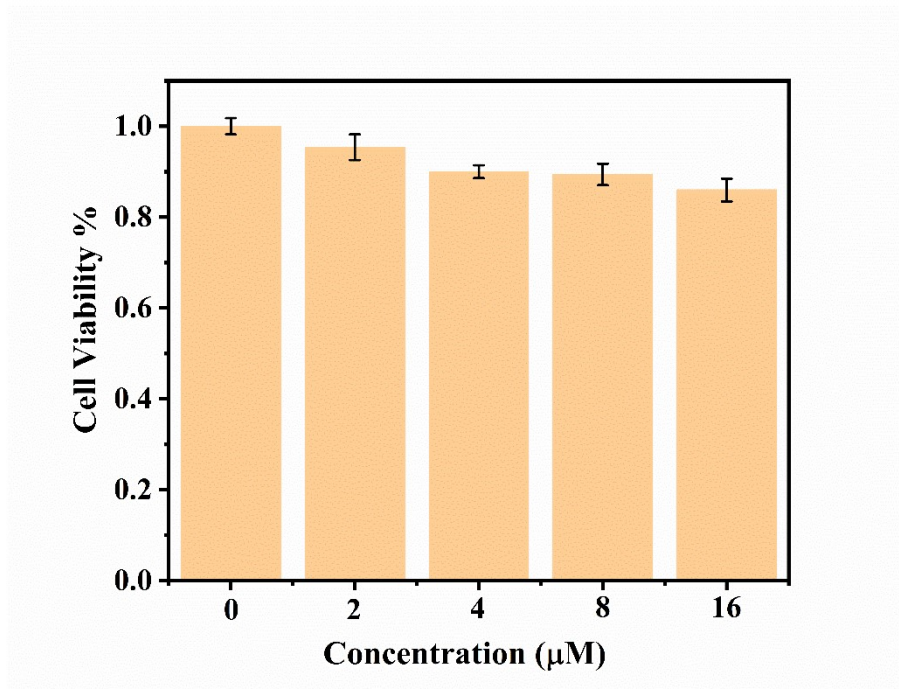

**Fig. S20** Cell viability (%) estimated by a MTT assay after incubation in different concentration of TAT-ZnPor (0-16 µM) at 37 °C for 24 h.

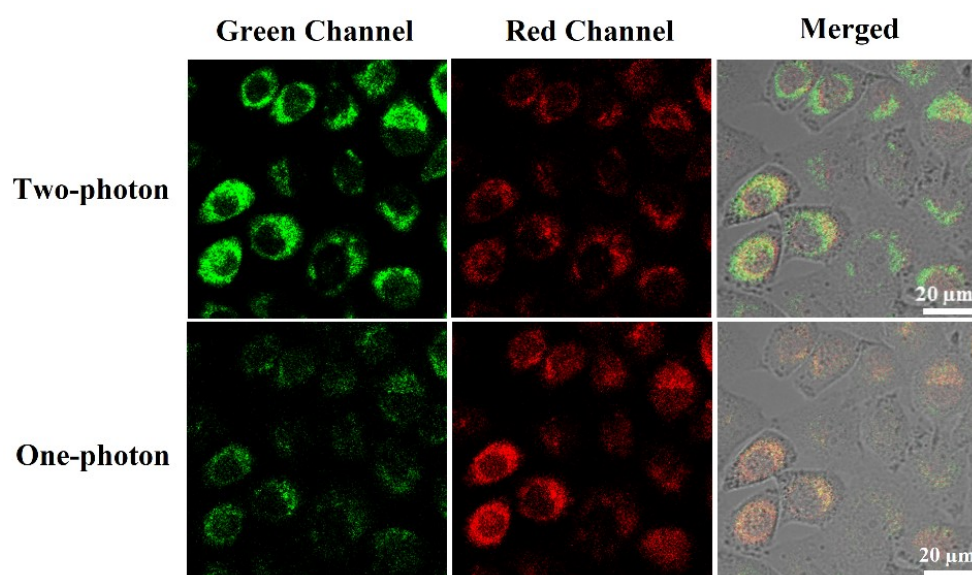

**Fig. S21** Two-photon ( $\lambda_{\text{ex}} = 820 \text{ nm}$ ) and one photon (red channel,  $\lambda_{\text{ex}} = 405 \text{ nm}$ ,  $\lambda_{\text{em}} = 570\text{-}620 \text{ nm}$ ; green channel,  $\lambda_{\text{ex}} = 457 \text{ nm}$ ,  $\lambda_{\text{em}} = 500\text{-}550 \text{ nm}$ ) confocal images of A549 cells treated with  $2 \mu\text{M}$  of **TAT-ZnPor**. (The last column is the merged images of bright-field, red channel and green channel.) Scale bar:  $20 \mu\text{m}$ .

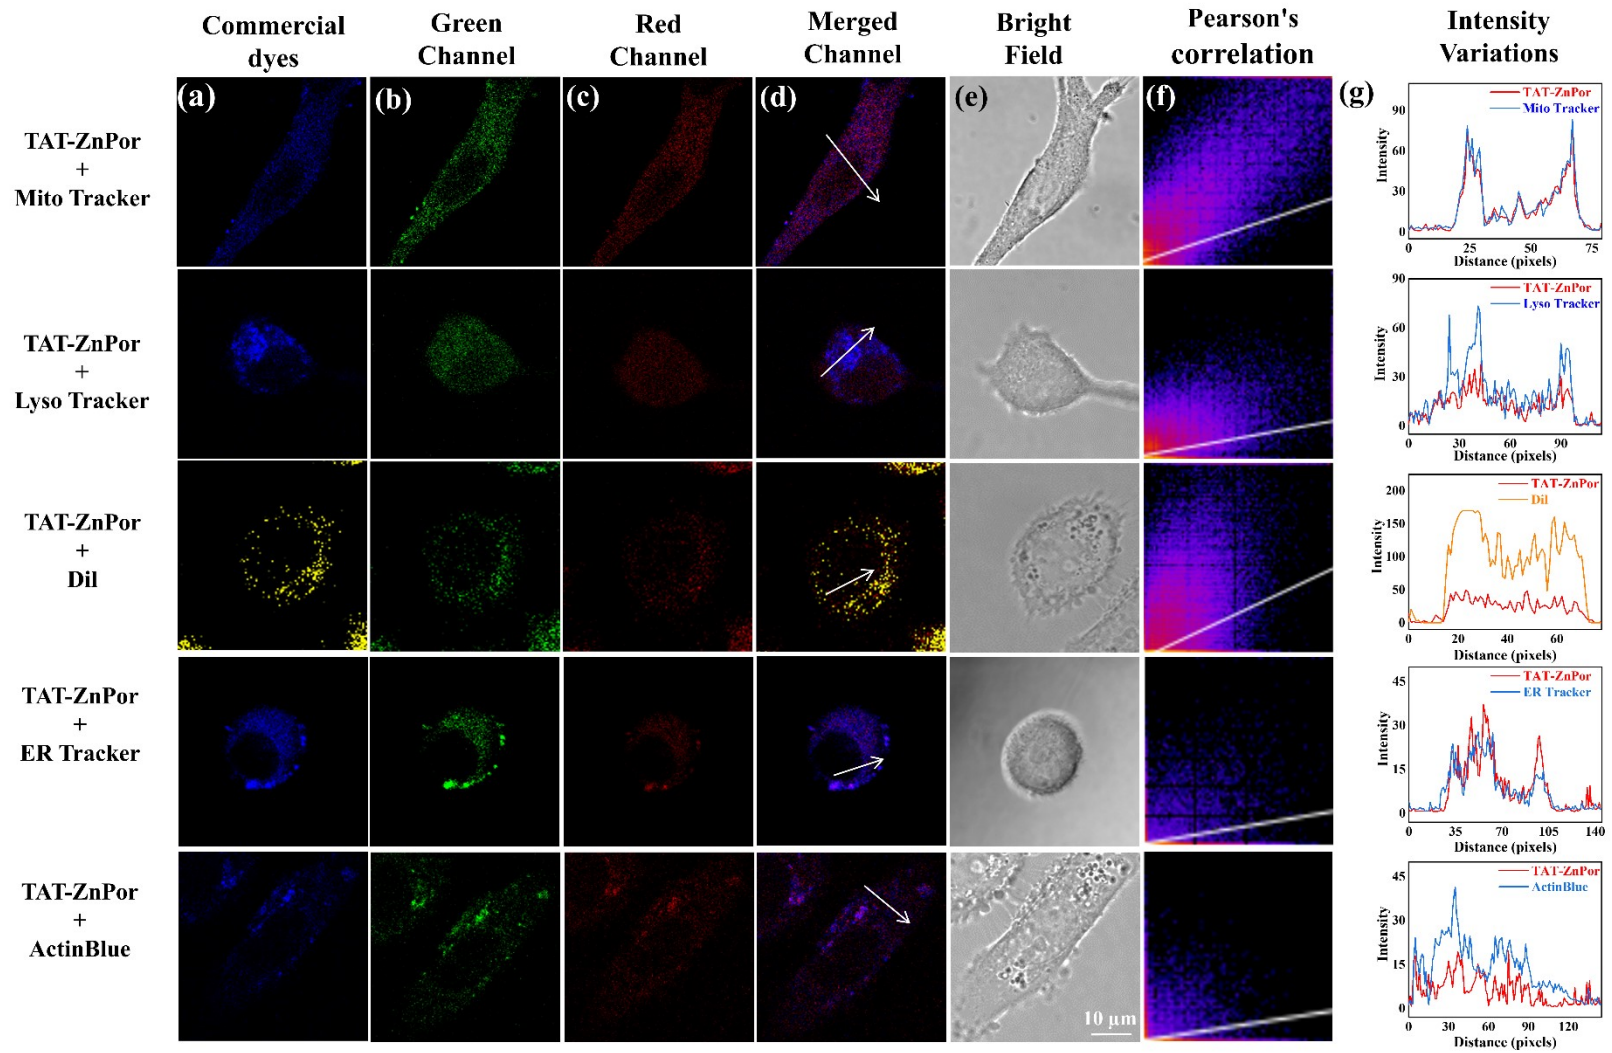

**Fig. S22** Co-localization images of A549 cells for **TAT-ZnPor**. (a) Orange channel ( $\lambda_{\text{ex}} = 552 \text{ nm}$ ,  $\lambda_{\text{em}} = 550\text{-}600 \text{ nm}$ ): staining with DilC18(3) ( $1 \mu\text{M}$ ), Blue Channel ( $\lambda_{\text{ex}} = 405 \text{ nm}$ ,  $\lambda_{\text{em}} = 400\text{-}500 \text{ nm}$ ): staining with MitoTracker Blue FX 490 ( $20 \mu\text{M}$ ), LysoTracker Blue DND-22 ( $100 \text{ nM}$ ), ER-tracker Blue-White DPX ( $100 \text{ nM}$ ) or ActinBlue ( $50 \text{ U/mL}$ ); (b) Green Channel ( $\lambda_{\text{ex}} = 405 \text{ nm}$ ,  $\lambda_{\text{em}} = 500\text{-}550 \text{ nm}$ ): staining with **TAT-ZnPor** ( $2 \mu\text{M}$ ); (c) Red Channel ( $\lambda_{\text{ex}} = 405 \text{ nm}$ ,  $\lambda_{\text{em}} = 550\text{-}700 \text{ nm}$ ): staining with **TAT-ZnPor** ( $2 \mu\text{M}$ ); (d) Merged: the overlaps of (a) and (c); (e) Brightfield; (f) The Pearson's correlation coefficient for the overlap between Orange/Blue channel and Red channel; (g) Fluorescence intensity profiles of **TAT-ZnPor** (in red channel) and commercial trackers (in Orange/Blue channel) traced along the linear regions of interest (ROIs, bright-blue lines in (d)) across selected cells. Scale bar:  $10 \mu\text{m}$ .



**Table S3** Comparison of the performance of **TAT-ZnPor** with reported probes for viscosity.

| Probes                   | $\lambda_{\text{ex}}/\lambda_{\text{em}}$ | Cell localization | Detection range (cp) | Detection limit | Viscosity response coefficient | Response model | Reference                                                                       |
|--------------------------|-------------------------------------------|-------------------|----------------------|-----------------|--------------------------------|----------------|---------------------------------------------------------------------------------|
| TAT-ZnPor                | 350/410, 647                              | mitochondrial     | 0.59-947             | 0.52 cp         | 0.29, 0.87                     | Ratiometric    | This work                                                                       |
| BODIPY                   | 330/427, 516                              | mitochondrial     | 0.6-945.35           | NR              | NR                             | Ratiometric    | Yang et al, <i>J. Am. Chem. Soc.</i> , 2013, <b>135</b> , 9181-9185             |
| Qca-Cy2                  | 335/385, 570                              | mitochondrial     | 100-950              | NR              | 0.335                          | Ratiometric    | Liu et al, <i>Tetrahedron Lett.</i> , 2018, <b>59</b> , 4540-4544               |
| TM-V                     | 425/477, 609                              | mitochondrial     | 1.01-950.2           | NR              | NR                             | Ratiometric    | Ren et al, <i>Sensor. Actuator. B Chem.</i> , 2018, <b>262</b> , 452-459        |
| porphyrin dimer <b>1</b> | 453/640, 695                              | NR                | 0.6-1500             | NR              | NR                             | Ratiometric    | Vyšniauskas et al, <i>Phys. Chem. Chem. Phys.</i> , 2015, <b>17</b> , 7548-7554 |
| dABp-3                   | 435/496, 565                              | NR                | 1.8-6.0              | NR              | 0.69                           | Ratiometric    | Li et al, <i>Anal. Chem.</i> , 2016, <b>88</b> , 5554-5560                      |
| RV-1@GQDs-               | 490/530,                                  | NR                | 0-600                | NR              | NR                             | Ratiometric    | Li et al, <i>Chem. Commun.</i> , 2020,                                          |

|          |         |               |            |         |      |         |                                                                          |
|----------|---------|---------------|------------|---------|------|---------|--------------------------------------------------------------------------|
| OH       | 635     |               |            |         |      |         | <b>56</b> , 14649-14652                                                  |
| Lyso-BTC | 470/685 | lysosomal     | 0-99% Gly  | NR      | NR   | Turn on | Chen et al, <i>Org. Biomol. Chem.</i> , 2019, <b>17</b> , 6398-6403      |
| MCB      | 420/566 | mitochondrial | 0.59-945.5 | NR      | 0.43 | Turn on | Fang et al, <i>Sensor. Actuator. B Chem.</i> , 2019, <b>297</b> , 126777 |
| VPZ1-3   | -/515   | NR            | 20-80% Gly | NR      | NR   | Turn on | Lei et al, <i>Front. Chem.</i> , 2019, <b>7</b> , 342                    |
| H-V      | 400/520 | cytoplasmic   | 0.59-945   | NR      | 0.50 | Turn on | Li et al, <i>J. Am. Chem. Soc.</i> , 2019, <b>141</b> , 18301-18307      |
| RFC-MRC  | 405/600 | mitochondrial | NR         | NR      | NR   | Turn on | He et al, <i>Anal. Chem.</i> , 2019, <b>91</b> , 15220-15228             |
| CBI-V    | 520/610 | mitochondrial | 1.4-956    | NR      | 0.52 | Turn on | Yin et al, <i>Anal. Chem.</i> , 2019, <b>91</b> , 8415-8421              |
| NI-VIS   | 560/670 | mitochondrial | 1-999      | NR      | 0.96 | Turn on | Zhang et al, <i>Anal. Chem.</i> , 2019, <b>91</b> , 10302-10309          |
| BMVC     | 470/550 | mitochondrial | 0.893-435  | NR      | 0.54 | Turn on | Zou et al, <i>Anal. Chem.</i> , 2019, <b>91</b> , 8574-8581              |
| BV-1     | 545/570 | mitochondrial | 2-868      | 0.16 cp | 0.47 | Turn on | Sun et al, <i>Talanta</i> , 2021, <b>225</b> , 121996                    |

|                  |                    |               |           |    |       |         |                                                                     |
|------------------|--------------------|---------------|-----------|----|-------|---------|---------------------------------------------------------------------|
| Lyso-B           | 550/586            | lysosomal     | 1-1410    | NR | NR    | Turn on | Li et al, <i>Anal. Chem.</i> , 2018, <b>90</b> , 5873-5878          |
| Lyso-BTC         | 505/685            | lysosomal     | 0-99% Gly | NR | NR    | Turn on | Chen et al, <i>Org. Biomol. Chem.</i> , 2019, <b>17</b> , 6398-6403 |
| BTV              | 470/520            | mitochondrial | 0.6-950   | NR | 0.72  | Turn on | Su et al, <i>Sensors</i> , 2016, <b>16</b> , 1397                   |
| Mito-V           | 561/634            | mitochondrial | 1.7-953   | NR | NR    | Turn on | Peng et al, <i>New J. Chem.</i> , 2019, <b>43</b> , 16945-16949     |
| MHC-V1<br>MHC-V2 | 470/628<br>545/579 | mitochondrial | 3.2-317   | NR | NR    | Turn on | Zhou et al, <i>New J. Chem.</i> , 2017, <b>41</b> , 11507-11511     |
| RM-V             | 530/575            | mitochondrial | 2.1-1596  | NR | NR    | Turn on | Dai et al, <i>Anal. Methods</i> , 2019, <b>11</b> , 4561-4565       |
| NI-VIS           | 560/670            | mitochondrial | 1.0-999   | NR | 0.96  | Turn on | Zhang et al, <i>Anal. Chem.</i> , 2019, <b>91</b> , 10302-10309     |
| RV-1             | 573/655            | mitochondrial | 0.6-953   | NR | 0.58  | Turn on | Guo et al, <i>J. Mater. Chem. B</i> , 2018, <b>6</b> , 2894-2900    |
| TPSN             | 525/637            | mitochondrial | 1-950     | NR | 0.646 | Turn on | Wang et al, <i>Chem. Pap.</i> , 2020, <b>74</b> , 1071-1078         |
| NV-1             | 590/744            | mitochondrial | 0.6-950   | NR | 0.40  | Turn on | Guo et al, <i>Talanta</i> , 2019, <b>204</b> , 868-874              |

|           |         |               |            |    |       |         |                                                                           |
|-----------|---------|---------------|------------|----|-------|---------|---------------------------------------------------------------------------|
| NL1       | 473/594 | mitochondrial | 0-90% Gly  | NR | NR    | Turn on | Tian et al, <i>Dyes Pigm.</i> , 2017, <b>147</b> , 90-98                  |
| NL2       | 478/593 |               |            |    |       |         |                                                                           |
| NL3       | 470/592 |               |            |    |       |         |                                                                           |
| PL1       | 472/594 | mitochondrial | 0-90% Gly  | NR | NR    | Turn on | Tian et al, <i>Dyes Pigm.</i> , 2017, <b>147</b> , 90-98                  |
| PL2       | 476/595 |               |            |    |       |         |                                                                           |
| PL3       | 470/591 |               |            |    |       |         |                                                                           |
| MitoSN    | 420/520 | mitochondrial | 1.0-950    | NR | 0.495 | Turn on | Wang et al, <i>Spectrochim. Acta. Part A</i> , 2018, <b>203</b> , 127-131 |
| TDHC      | 525/592 | mitochondrial | 0-453      | NR | 0.59  | Turn on | Baek et al, <i>Biosens. Bioelectron.</i> , 2016, <b>86</b> , 885-891      |
| L         | 515/590 | mitochondrial | 0-99% Gly  | NR | NR    | Turn on | Wang et al, <i>New J. Chem.</i> , 2019, <b>43</b> , 8811-8815             |
| SFC-Cy007 | 678/697 | mitochondrial | 1-621      | NR | NR    | Turn on | Park et al, <i>Dyes Pigm.</i> , 2020, <b>174</b> , 108080                 |
| PFV       | 525/570 | mitochondrial | 1-1412     | NR | NR    | Turn on | Wu et al, <i>Dyes Pigm.</i> , 2019, <b>168</b> , 134-139                  |
| Mito-V    | 511/583 | mitochondrial | 0-100% Gly | NR | 0.58  | Turn on | Chen et al, <i>Chem. Commun.</i> , 2019, <b>55</b> , 7410-7413            |
| Vis-A     | 501/517 | mitochondrial | 0.6-360    | NR | NR    | Turn on | Song et al, <i>J. Mater. Chem. B</i> ,                                    |

|          |         |               |            |    |       |         |                                                                  |
|----------|---------|---------------|------------|----|-------|---------|------------------------------------------------------------------|
|          |         |               |            |    |       |         | 2017, <b>5</b> , 360-368                                         |
| HC-1     | 610     | mitochondrial | 13.5-950   | NR | 0.457 | Turn on | Raja et al, <i>Chemistry Select</i> , 2017, <b>2</b> , 4609-4616 |
| TPE-V    | 460/650 | mitochondrial | 1.4-950    | NR | 0.674 | Turn on | Ma et al, <i>J. Mater. Chem. B</i> , 2018, <b>6</b> , 6212-6216  |
| MitoAIE1 | -/625   | mitochondrial | 0.89-942.5 | NR | 0.38  | Turn on | Chen et al, <i>Anal. Chem.</i> , 2018, <b>90</b> , 8736-8741     |
| LysoAIE1 | -/540   | lysosomal     | 0.89-942.5 | NR | 0.32  | Turn on | Chen et al, <i>Anal. Chem.</i> , 2018, <b>90</b> , 8736-8741     |
| Mito-VS  | 500/610 | mitochondrial | 1.03-584.5 | NR | NR    | Turn on | Li et al, <i>Anal. Chem.</i> , 2018, <b>90</b> , 94189425        |
| CBI-V    | 520/610 | mitochondrial | 1.4-956    | NR | 0.524 | Turn on | Yin et al, <i>Anal. Chem.</i> , 2019, <b>91</b> , 8415-8421      |
| EIMV     | 510/600 | mitochondrial | 1.5-1099.5 | NR | NR    | Turn on | Wang et al, <i>Analyst</i> , 2019, <b>144</b> , 6247-6253        |
| NV       | 580/635 | mitochondrial | 0-95% Gly  | NR | 0.453 | Turn on | Zhu et al, <i>Dyes Pigm.</i> , 2020, <b>172</b> , 107859         |
| BMVC     | 470/560 | mitochondrial | 0.893-435  | NR | NR    | Turn on | Zou et al, <i>Anal. Chem.</i> , 2019, <b>91</b> , 8574–8581      |

|                  |                 |                          |             |    |       |         |                                                                          |
|------------------|-----------------|--------------------------|-------------|----|-------|---------|--------------------------------------------------------------------------|
| FMR-1<br>FMR-2   | 460/525         | mitochondrial            | 0.6-1178    | NR | NR    | Turn on | Steinmark et al, <i>PLoS One</i> , 2019, <b>14</b> , e0211165            |
| Mito-VH          | 500/610         | mitochondrial            | Ethanol-Gly | NR | NR    | Turn on | Ren et al, <i>Anal. Chem.</i> , 2017, <b>89</b> , 552-555                |
| Mito-LX          | 480/730         | mitochondrial            | 0.60-945    | NR | 0.44  | Turn on | Li et al, <i>J. Mater. Chem. B</i> , 2019, <b>7</b> , 4243-4251          |
| TP-1Bz           | 340/403,<br>650 | mitochondrial            | 103.0-95.5  | NR | NR    | Turn on | Sun et al, <i>Sensor. Actuator. B Chem.</i> , 2018, <b>276</b> , 238-246 |
| MBCB             | 351/415,<br>567 | mitochondrial            | 0.99-1396   | NR | 0.23  | Turn on | Sun et al, <i>Dyes Pigm.</i> , 2019, <b>171</b> , 107709                 |
| BODIPY-2         | 485/510         | NR                       | 0.6-930     | NR | NR    | Turn on | López-Duarte et al, <i>Chem. Commun.</i> , 2014, <b>50</b> , 5282-5284   |
| 1b               | 546/648         | endoplasmic<br>reticulum | 0.89-856    | NR | 1.31  | Turn on | Wang et al, <i>J. Mater. Chem. B</i> , 2021, <b>9</b> , 5664-5669        |
| TbL <sup>1</sup> | 310/542         | NR                       | 1.8-6.0     | NR | 0.18  | Turn on | Bui et al, <i>J. Am. Chem. Soc.</i> , 2017, <b>139</b> , 7693-7696       |
| BDP-V BG         | 490/520         | NR                       | 0.6-248     | NR | 0.018 | Turn on | Wang et al, <i>Biosens. Bioelectron.</i> , 2017, <b>89</b> , 757-764     |

|         |         |               |            |    |      |         |                                                                          |
|---------|---------|---------------|------------|----|------|---------|--------------------------------------------------------------------------|
| Lyso-NA | 550/610 | lysosomal     | 1-1410     | NR | NR   | Turn on | Guo et al, <i>J. Mater. Chem. B</i> ,<br>2018, <b>6</b> , 580-585        |
| BTP     | 590/635 | lysosomal     | 0.96-965   | NR | NR   | Turn on | Ren et al, <i>J. Mater. Chem. B</i> ,<br>2019, <b>7</b> , 6181-6186      |
| DXB-CBT | 560/614 | NR            | 0.6-1317   | NR | 0.61 | Turn on | Karpenko et al, <i>J. Mater. Chem. C</i> , 2016, <b>4</b> , 3002-3009    |
| BDHA    | 457/539 | lysosomal     | 1.62-851.6 | NR | 0.63 | Turn on | Chen et al, <i>Spectrochim. Acta, Part A</i> , 2022, <b>175</b> , 121141 |
| VLAP    | 550/700 | mitochondrial | 0.893-435  | NR | 0.65 | Turn on | Li et al, <i>Chem. Eng. J.</i> , 2022,<br><b>435</b> , 135043            |
| Lys-V   | 430/515 | lysosomal     | 7.9-438.4  | NR | NR   | Turn on | Li et al, <i>J. Mater. Chem. B</i> ,<br>2018, <b>6</b> , 6592-6598       |
| MCN     | 400/470 | cytoplasm     | 1.03-956   | NR | 0.65 | Turn on | Ning et al, <i>J. Mater. Chem. B</i> ,<br>2017, <b>5</b> , 2743-2749     |

NR: Not Reported.

## 9. References

- 1 N. S. Makarov, M. Drobizhev and A. Rebane, *J. Opt. Soc. Am. B*, 2008, **16**, 4029-4047.
- 2 C. Xu and W. W. Webb, *J. Opt. Soc. Am. B*, 1996, **13**, 481-491.
- 3 (a) R. Bauernschmitt and R. Ahlrichs, *Chem. Phys. Lett.*, 1996, **256**, 454-464; (b) M. E. Casida, C. Jamorski, K. C. Casida and D. R. Salahub, *J. Chem. Phys.*, 1998, **108**, 4439-4449; (c) R. E. Stratmann, G. E. Scuseria and M. J. Frisch, *Chem. Phys. Lett.*, 1996, **257**, 213-233; (d) C. V. Caillie and R. D. Amos, *Chem. Phys. Lett.*, 1999, **308**, 249-255; (e) C. V. Caillie and R. D. Amos, *Chem. Phys. Lett.*, 2000, **317**, 159-164; (f) F. Furche and R. Ahlrichs, *J. Chem. Phys.*, 2002, **117**, 7433-7447; (g) G. Scalmani, M. J. Frisch, B. Mennucci, J. Tomasi, R. Cammi and V. Barone, *J. Chem. Phys.*, 2006, **124**, 1-15.
- 4 (a) J. P. Perdew, K. Burke and M. Ernzerhof, *Phys. Rev. Lett.*, 1996, **77**, 3865-3868; (b) J. P. Perdew, K. Burke and M. Ernzerhof, *Phys. Rev. Lett.*, 1997, **78**, 1396; (c) C. Adamo and V. Barone, *J. Chem. Phys.*, 1999, **110**, 6158-6170.
- 5 M. J. Frisch, G. W. Trucks, H. B. Schlegel, G. E. Scuseria, M. A. Robb, J. R. Cheeseman, G. Scalmani, V. Barone, B. Mennucci, G. A. Petersson, H. Nakatsuji, M. Caricato, X. Li, H. P. Hratchian, A. F. Izmaylov, J. Bloino, G. Zheng, J. L. Sonnenberg, M. Hada, M. Ehara, K. Toyota, R. Fukuda, J. Hasegawa, M. Ishida, T. Nakajima, Y. Honda, O. Kitao, H. Nakai, T. Vreven, J. A. Montgomery Jr., J. E. Peralta, F. Ogliaro, M. J. Bearpark, J. Heyd, E. N. Brothers, K. N. Kudin, V. N. Staroverov, R. Kobayashi, J. Normand, K. Raghavachari, A. P. Rendell, J. C. Burant, S. S. Iyengar, J. Tomasi, M. Cossi, N. Rega, N. J. Millam, M. Klene, J. E. Knox, J. B. Cross, V. Bakken, C. Adamo, J. Jaramillo, R. Gomperts, R. E. Stratmann, O. Yazyev, A. J. Austin, R. Cammi, C. Pomelli, J. W. Ochterski, R. L. Martin, K. Morokuma, V. G. Zakrzewski, G. A. Voth, P. Salvador, J. J. Dannenberg, S. Dapprich, A. D. Daniels, Ö. Farkas, J. B. Foresman, J. V. Ortiz, J. Cioslowski, and D. J. Fox, Gaussian, Inc, Wallingford, CT, USA, 2009.
- 6 (a) R. B. J. S. Krishnan, J. S. Binkley, R. Seeger and J. A. Pople, *J. Chem. Phys.*, 1980, **72**, 650-654; (b) M. Dolg, U. Wedig, H. Stoll and H. Preuss, *J. Chem. Phys.*, 1987, **86**, 866-872; (c) J. M. Martin and A. Sundermann, *J. Chem. Phys.*, 2001, **114**, 3408-3420.



- 7 G. Scalmani and M. J. Frisch, *J. Chem. Phys.*, 2010, **132**, 114110.
- 8 (a) T. Lu and F. Chen, *J. Comput. Chem.*, 2012, **33**, 580-592; (b) T. Lu, Q. Chen, *Theor. Chem. Acc.*, 2020, **139**, 25; (c) W. Humphrey, A. Dalke and K. Schulten, *J. Mol. Graph.*, 1996, **14**, 33-38.
- 9 D. D. Qi, TD-Analy (Version 1.13), University of Science and Technology Beijing, Beijing, China, 2015.
- 10 H. Maeda, T. Maeda, K. Mizuno, K. Fujimoto, H. Shimizu and M. Inouye, *Chem. Eur. J.*, 2006, **12**, 824-831.
- 11 D. J. Quimby and F. R. Longo, *J. Am. Chem. Soc.*, 1975, **97**, 5111-5117.
